# Supplementary material
Source: publisher figshare collection journal article supplement (https://gsapubs.figshare.com/ndownloader/files/23318636)
Supplement: Supplementary file 1 [file 23318636]

## Sheet: Ichilula1.csv
391.76	0.14	391.62	THICKNESS	LITHOLOGY	GRAIN_SIZE	BED_FORM	TOP	NOTES	COLOR	OTHER	SAMPLE	LAYER	SAMP_HEIGHT	UPDATED_HEIGHT	MEASUREMENT
0.69		0	0.69	si	sfn	mas					IC1_0.01	1	0.01	0.01
1.3		0	0.61	si	sfn			rs			IC1_0.3	1	0.3	0.3
1.94		0	0.64	qtz	smd	trg					IC1_0.65	1	0.65	0.65
1.99		0	0.05	qtz	sfn						IC1_0.9	2	0.9	0.9
4.37		0	2.38	qtz	smd	mas					IC1_1.2	2	1.2	1.2
4.82		0	0.45	si	slt						IC1_1.31	3	1.31	1.31
5.05		0	0.23	qtz	smd	par					IC1_1.62	3	1.62	1.62
5.11		0	0.06	qtz	sfn						IC1_1.93	3	1.93	1.93
9.41		0	4.3	qtz	smd	mas					IC1_2.25	5	2.25	2.25
11.1		0	1.69	si	sfn	trg					IC1_2.54	5	2.54	2.54
11.29		0	0.19	si	slt			rs			IC1_2.89	5	2.89	2.89
11.51		0	0.22	si	smd	wav					IC1_3.14	5	3.14	3.14
12.08		0	0.57	COVER							IC1_3.44	5	3.44	3.44
12.41		0	0.33	qtz	smd	par					IC1_3.74	5	3.74	3.74
12.5		0	0.09	qtz	smd						IC1_4.04	5	4.04	4.04
12.64		0	0.14	si	smd	trg					IC1_4.36	5	4.36	4.36
12.73		0	0.09	si	smd			rs			IC1_4.71	6	4.71	4.71
12.86		0	0.13	qtz	smd	trg					IC1_4.84	7	4.84	4.84
12.93		0	0.07	si	sfn			rs			IC1_5.15	9	5.15	5.15
12.99		0	0.06	qtz	smd	trg					IC1_5.52	9	5.52	5.52
13.01		0	0.02	si	shl						IC1_5.82	9	5.82	5.82
13.04		0	0.03	si	smd	trg					IC1_6.12	9	6.12	6.12
13.09		0	0.05	si	sfn						IC1_6.42	9	6.42	6.42
14.45		0	1.36	qtz	smd	trg					IC1_6.74	9	6.74	6.74
14.63		0	0.18	si	sfn			rs			IC1_7.02	9	7.02	7.02
15.18		0	0.55	qtz	smd	mas					IC1_7.38	9	7.38	7.38
15.27		0	0.09	COVER							IC1_7.7	9	7.7	7.7
15.4		0	0.13	qtz	smd	sup					IC1_8.1	9	8.1	8.1
15.44		0	0.04	COVER							IC1_8.36	9	8.36	8.36
15.51		0	0.07	qtz	smd	mas					IC1_8.66	9	8.66	8.66
15.52		0	0.01	qtz	sfn	fnlam					IC1_8.9	9	8.9	8.9
15.69		0	0.17	qtz	smd						IC1_9.1	9	9.1	9.1
16.85		0	1.16	COVER							IC1_9.4	9	9.4	9.4
16.96		0	0.11	si	smd	fnlam					IC1_9.7	10	9.7	9.7
17.33		0	0.37	qtz	smd	mas					IC1_10	10	10	10
17.43		0	0.1	si	sfn	fnlam		rs			IC1_10.49	10	10.49	10.49
17.56		0	0.13	qtz	smd	mas					IC1_10.74	10	10.74	10.74
17.6		0	0.04	COVER							IC1_11.05	10	11.05	11.05
17.67		0	0.07	qtz	smd	mas					IC1_11.5	12	11.5	11.5
17.71		0	0.04	qtz	scs						IC1_12.18	14	12.18	12.18
18.28		0	0.57	qtz	smd	fnlam					IC1_12.62	16	12.62	12.62
18.41		0	0.13	COVER				rs			IC1_12.84	18	12.84	12.84
21.82		0	3.41	qtz	smd	fnlam					IC1_13.11	24	13.11	13.11
22.25		0	0.43	COVER							IC1_13.45	24	13.45	13.45
25.43		0	3.18	si	smd	mas		purple			IC1_13.75	24	13.75	13.75
27.83		0	2.4	si	smd	flzr					IC1_14.05	24	14.05	14.05
28.29		0	0.46	si	sfn						IC1_14.34	24	14.34	14.34
28.35		0	0.06	qtz	smd	mc					IC1_14.55	25	14.55	14.55
29.59		0	1.24	si	slt		lod	red			IC1_14.8	26	14.8	14.8
30.04		0	0.45	qtz	smd	mas					IC1_15.1	26	15.1	15.1
30.2		0	0.16	si	smd			rs			IC1_15.4	28	15.4	15.4
30.37		0	0.17	qtz	smd	flzr					IC1_15.54	32	15.54	15.54
30.53		0	0.16	qtz	smd	pln					IC1_17.05	35	17.05	17.05
31.49		0	0.96	qtz	smd						IC1_17.35	36	17.35	17.35
31.54		0	0.05	si	slt						IC1_17.45	37	17.45	17.45
31.8		0	0.26	qtz	smd	flzr					IC1_17.7	40	17.7	17.7
31.97		0	0.17	qtz	smd	brc_shl					IC1_18.03	41	18.03	18.03
32.13		0	0.16	si	slt						IC1_18.29	43	18.29	18.29
32.2		0	0.07	si	sfn	flzr					IC1_18.63	43	18.63	18.63
34.78		0	2.58	si	shl						IC1_18.9	43	18.9	18.9
34.97		0	0.19	qtz	smd	trg					IC1_19.27	43	19.27	19.27
35.26		0	0.29	si	sfn	flzr					IC1_19.53	43	19.53	19.53
36.24		0	0.98	qtz	smd	fnlam					IC1_19.84	43	19.84	19.84
36.86		0	0.62	qtz	smd	trg					IC1_20.14	43	20.14	20.14
37.89		0	1.03	si	smd	fnlam					IC1_20.44	43	20.44	20.44
37.94		0	0.05	si	shl						IC1_20.74	43	20.74	20.74
38.25		0	0.31	si	sfn	wvy					IC1_21.04	43	21.04	21.04
38.26		0	0.01	si	shl			rs			IC1_21.3	43	21.3	21.3
38.36		0	0.1	si	sfn	trg					IC1_21.54	43	21.54	21.54
38.37		0	0.01	si	shl						IC1_22.28	45	22.28	22.28
38.64		0	0.27	si	sfn	trg					IC1_22.64	45	22.64	22.64
38.77		0	0.13	si	slt						IC1_22.94	45	22.94	22.94
39.05		0	0.28	si	sfn	trg; vug					IC1_23.44	45	23.44	23.44
40.73		0	1.68	si	shl	vug					IC1_23.84	45	23.84	23.84
42.46		0	1.73	qtz	smd	trg					IC1_24.14	45	24.14	24.14
43.13		0	0.67	si	smd	mas					IC1_24.5	45	24.5	24.5
43.4		0	0.27	qtz	smd	trg					IC1_24.8	45	24.8	24.8
43.52		0	0.12	si	smd	pln					IC1_25.1	45	25.1	25.1
44.88		0	1.36	qtz	smd	sup					IC1_25.4	45	25.4	25.4
47.98		0	3.1	qtz	smd	mas					IC1_25.73	46	25.73	25.73
48.01		0	0.03	COVER				rs			IC1_26.03	46	26.03	26.03
49.22		0	1.21	qtz	smd	mas; mc					IC1_26.35	46	26.35	26.35
49.54		0	0.32	si	smd	flzr					IC1_26.7	46	26.7	26.7
50.15		0	0.61	qtz	smd	mas					IC1_26.98	46	26.98	26.98
50.54		0	0.39	qtz	smd	pln					IC1_27.3	46	27.3	27.3
52.45		0	1.91	qtz	smd	mas					IC1_27.63	46	27.63	27.63
54.4		0	1.95	si	shl						IC1_27.93	47	27.93	27.93
55.49		0	1.09	qtz	smd	flzr					IC1_28.26	47	28.26	28.26
55.56		0	0.07	qtz	smd	br_slt					IC1_28.65	49	28.65	28.65
55.7		0	0.14	qtz	smd	flzr					IC1_28.95	49	28.95	28.95
55.96		0	0.26	si	slt		lod				IC1_29.25	49	29.25	29.25
56.47		0	0.51	qtz	sfn	flzr					IC1_29.55	49	29.55	29.55
56.62		0	0.15	si	slt						IC1_29.85	50	29.85	29.85
56.81		0	0.19	qtz	smd	br_slt					IC1_30.15	51	30.15	30.15
61.31		0	4.5	si	slt						IC1_30.45	53	30.45	30.45
62.18		0	0.87	qtz	scs	mas					IC1_30.75	54	30.75	30.75
62.26		0	0.08	si	shl		lod				IC1_31.05	54	31.05	31.05
63.29		0	1.03	qtz	smd	trg					IC1_31.35	54	31.35	31.35
63.41		0	0.12	si	slt						IC1_31.65	56	31.65	31.65
63.47		0	0.06	si	smd	br_ic					IC1_31.96	57	31.96	31.96
63.49		0	0.02	si	slt		lod				IC1_34.78	61	34.78	34.78
63.6		0	0.11	si	smd	br_slt					IC1_35.08	62	35.08	35.08
63.63		0	0.03	si	slt		lod				IC1_35.38	63	35.38	35.38
63.7		0	0.07	si	smd	br_slt					IC1_35.7	63	35.7	35.7
64.14		0	0.44	si	shl						IC1_36	63	36	36
64.39		0	0.25	si	smd	flzr					IC1_36.3	64	36.3	36.3
64.53		0	0.14	si	shl						IC1_36.6	64	36.6	36.6
64.58		0	0.05	si	smd						IC1_36.99	65	36.99	36.99
64.79		0	0.21	si	shl						IC1_37.3	65	37.3	37.3
65.09		0	0.3	si	smd	br_slt; flzr					IC1_37.6	65	37.6	37.6
65.17		0	0.08	si	slt						IC1_37.9	66	37.9	37.9
65.3		0	0.13	qtz	scs	trg					IC1_38.2	67	38.2	38.2
65.4		0	0.1	si	slt						IC1_38.5	71	38.5	38.5
65.49		0	0.09	si	sfn	flzr					IC1_38.86	73	38.86	38.86
65.58		0	0.09	si	slt						IC1_41	75	41	41
65.64		0	0.06	si	sfn	mas					IC1_41.3	75	41.3	41.3
65.87		0	0.23	si	smd	trg					IC1_41.66	75	41.66	41.66
65.88		0	0.01	si	slt						IC1_42	75	42	42
66.06		0	0.18	si	smd	br_slt					IC1_42.3	75	42.3	42.3
66.07		0	0.01	si	slt						IC1_42.6	76	42.6	42.6
66.22		0	0.15	qtz	smd	br_slt					IC1_42.9	76	42.9	42.9
67.13		0	0.91	qtz	smd	sup					IC1_43.2	77	43.2	43.2
67.28		0	0.15	si	smd			rs			IC1_43.6	79	43.6	43.6
67.38		0	0.1	si	smd						IC1_44	79	44	44
67.4		0	0.02	si	shl						IC1_44.3	79	44.3	44.3
67.57		0	0.17	si	smd	flzr; mc					IC1_44.6	79	44.6	44.6
67.58		0	0.01	COVER				rs			IC1_44.92	80	44.92	44.92
68.29		0	0.71	qtz	smd	flzr; mc					IC1_45.3	80	45.3	45.3
68.57		0	0.28	si	sfn			rs			IC1_45.6	80	45.6	45.6
69.16		0	0.59	si	smd	flzr					IC1_45.9	80	45.9	45.9
69.25		0	0.09	si	shl						IC1_46.23	80	46.23	46.23
69.81		0	0.56	si	smd	trg; mc					IC1_46.44	80	46.44	46.44
69.92		0	0.11	si	slt						IC1_46.9	80	46.9	46.9
70.69		0	0.77	qtz	smd	fnlam					IC1_47.1	80	47.1	47.1
71.87		0	1.18	qtz	smd	mas					IC1_47.41	80	47.41	47.41
72.52		0	0.65	si	smd	fnlam					IC1_47.85	80	47.85	47.85
74.24		0	1.72	si	smd	trg					IC1_48.3	82	48.3	48.3
74.32		0	0.08	si	shl						IC1_48.5	82	48.5	48.5
75.87		0	1.55	si	smd	flzr					IC1_48.8	82	48.8	48.8
76.34		0	0.47	si	sfn	mc; vug					IC1_49.1	82	49.1	49.1
79.43		0	3.09	si	slt	vug					IC1_49.33	83	49.33	49.33
80.03		0	0.6	qtz	smd	mas; mc					IC1_49.8	84	49.8	49.8
80.15		0	0.12	si	sfn			rs			IC1_50.1	84	50.1	50.1
81.06		0	0.91	si	smd	mas					IC1_50.4	85	50.4	50.4
81.12		0	0.06	si	sfn			rs			IC1_50.7	86	50.7	50.7
81.23		0	0.11	si	smd	mas					IC1_51	86	51	51
81.27		0	0.04	si	sfn			rs			IC1_51.3	86	51.3	51.3
81.71		0	0.44	si	smd	mas					IC1_51.6	86	51.6	51.6
81.73		0	0.02	si	shl						IC1_51.9	86	51.9	51.9
82.6		0	0.87	qtz	smd	mas					IC1_54.41	88	54.41	54.41
82.63		0	0.03	qtz	smd			rs			IC1_54.73	88	54.73	54.73
82.67		0	0.04	si	smd						IC1_55	88	55	55
82.72		0	0.05	qtz	smd			rs			IC1_55.37	88	55.37	55.37
82.78		0	0.06	si	smd						IC1_55.65	90	55.65	55.65
82.85		0	0.07	qtz	smd						IC1_56	92	56	56
83.03		0	0.18	si	smd	mas					IC1_56.15	92	56.15	56.15
83.1		0	0.07	qtz	smd					mud drapes	IC1_56.45	92	56.45	56.45
83.9		0	0.8	qtz	smd				orange	orange	IC1_56.81	94	56.81	56.81
84.16		0	0.26	qtz	smd			rs			IC1_61.32	96	61.32	61.32
84.54		0	0.38	si	sfn					mud drapes	IC1_61.62	96	61.62	61.62
85.44		0	0.9	si	slt					sand lenses	IC1_61.92	96	61.92	61.92
86		0	0.56	si	smd	mas		rs			IC1_62.26	98	62.26	62.26
86.77		0	0.77	qtz	smd						IC1_62.56	98	62.56	62.56
87.07		0	0.3	si	smd			rs		mud drapes	IC1_62.86	98	62.86	62.86
87.52		0	0.45	si	slt			rs		mud drapes	IC1_63.16	98	63.16	63.16
88.53		0	1.01	si	sfn			rs		silty	IC1_63.41	100	63.41	63.41
88.64		0	0.11	ls	rib	mas					IC1_63.7	104	63.7	63.7
88.67		0	0.03	ls	rib	fnlam					IC1_64	105	64	64	0.0001678
89.05		0	0.38	ls	rib	mas					IC1_64.39	106	64.39	64.39
89.35		0	0.3	si	slt					sand lenses	IC1_64.97	110	64.97	64.97
93.33		0	3.98	si	sfn	mas		rs			IC1_65.29	112	65.29	65.29
93.48		0	0.15	ls	rib	fnlam; wav				coarser starved ripples	IC1_65.43	114	65.43	65.43
93.49		0	0.01	COVER							IC1_65.69	117	65.69	65.69
93.54		0	0.05	qtz	smd						IC1_66	119	66	66
93.55		0	0.01	COVER							IC1_66.27	122	66.27	66.27
93.58		0	0.03	ls	rib	wav				grain stone wave ripples	IC1_66.57	122	66.57	66.57
94.92		0	1.34	si	slt			rs			IC1_66.95	122	66.95	66.95
94.94		0	0.02	qtz	smd	fnlam					IC1_67.25	123	67.25	67.25
95.07		0	0.13	COVER				rs			IC1_67.55	126	67.55	67.55
95.19		0	0.12	ls	rib					starved ripples	IC1_67.85	128	67.85	67.85
95.21		0	0.02	COVER				rs			IC1_68.25	128	68.25	68.25
95.6		0	0.39	ls	rib					sandy starved ripples	IC1_68.42	129	68.42	68.42	0.0001673
95.62		0	0.02	COVER							IC1_68.57	130	68.57	68.57
95.74		0	0.12	ls	rib					sandy qtz lenses?	IC1_68.89	130	68.89	68.89
95.76		0	0.02	COVER							IC1_69.2	131	69.2	69.2	0.0001711
95.9		0	0.14	ls	rib					sandy qtz lenses?	IC1_69.5	132	69.5	69.5
95.99		0	0.09	si	shl				brown		IC1_69.77	132	69.77	69.77
96.47		0	0.48	ls	rib	wav				qtz lenses	IC1_70.05	134	70.05	70.05
100.42		0	3.95	si	slt			rs			IC1_70.35	134	70.35	70.35
101.55		0	1.13	ls	rib	wav				some micrite	IC1_70.65	134	70.65	70.65
102.12		0	0.57	si	slt					eggshell white color	IC1_70.9	135	70.9	70.9
102.21		0	0.09	ls	mic	strm; vug					IC1_71.2	135	71.2	71.2
103.38		0	1.17	si	slt						IC1_71.55	135	71.55	71.55
103.49		0	0.11	ls	mic						IC1_71.87	135	71.87	71.87
104.85		0	1.36	si	slt				orange	micaceous, orange	IC1_72.27	136	72.27	72.27
104.99		0	0.14	ls	mic						IC1_72.7	136	72.7	72.7
106.23		0	1.24	si	slt					micaceous	IC1_72.9	137	72.9	72.9
106.36		0	0.13	ls	rib						IC1_73.2	137	73.2	73.2
107.82		0	1.46	si	slt					micaceous	IC1_74.3	138	74.3	74.3	0.0001686
108.33		0	0.51	ls	rib						IC1_74.33	139	74.33	74.33
109.41		0	1.08	si	shl						IC1_74.63	139	74.63	74.63
110.49		0	1.08	ls	rib					sandy top? This is the trace that sketched me out	IC1_74.84	139	74.84	74.84
110.54		0	0.05	qtz	smd						IC1_75.1	139	75.1	75.1
112.5		0	1.96	COVER							IC1_75.47	139	75.47	75.47
114.41		0	1.91	si	shl				black	black to green	IC1_75.85	139	75.85	75.85
114.93		0	0.52	si	slt				green	green	IC1_76.04	140	76.04	76.04	0.0002169
114.98		0	0.05	ls	rib						IC1_76.33	140	76.33	76.33	0.0002447
114.99		0	0.01	si	slt						IC1_76.65	141	76.65	76.65	0.0001783
115.13		0	0.14	ls	rib						IC1_76.85	141	76.85	76.85	0.0001855
115.42		0	0.29	si	slt						IC1_77.15	141	77.15	77.15	0.0001945
115.98		0	0.56	qtz	smd	wav				cc	IC1_77.45	141	77.45	77.45	0.0002452
117.07		0	1.09	si	slt						IC1_77.85	141	77.85	77.85	0.0001976
117.13		0	0.06	ls	rib						IC1_78.15	141	78.15	78.15	0.0001829
117.14		0	0.01	si	shl						IC1_78.45	141	78.45	78.45	0.0002116
117.23		0	0.09	ls	rib						IC1_78.75	141	78.75	78.75	0.0002675
117.33		0	0.1	qtz	smd	wav					IC1_79.05	141	79.05	79.05	0.0002062
118.9		0	1.57	si	shl						IC1_79.34	141	79.34	79.34	0.0002391
119.05		0	0.15	ls	mic	strm					IC1_79.45	142	79.45	79.45
119.55		0	0.5	si	shl				black	black	IC1_79.75	142	79.75	79.75
119.77		0	0.22	ls	rib						IC1_80.25	144	80.25	80.25
120.13		0	0.36	si	shl					rib lenses	IC1_80.5	144	80.5	80.5
120.38		0	0.25	si	shl				black	black	IC1_80.8	144	80.8	80.8
120.66		0	0.28	si	slt						IC1_81.1	145	81.1	81.1
120.88		0	0.22	si	shl				black	black	IC1_81.3	148	81.3	81.3
120.96		0	0.08	ls	rib						IC1_81.6	148	81.6	81.6
121.15		0	0.19	si	shl						IC1_81.92	150	81.92	81.92
121.42		0	0.27	si	slt				green	green	IC1_82.2	150	82.2	82.2
121.66		0	0.24	ls	rib					silty, sandy lenses	IC1_82.53	150	82.53	82.53
122.54		0	0.88	si	shl				green	green	IC1_82.86	156	82.86	82.86
122.59		0	0.05	ls	rib						IC1_83.13	158	83.13	83.13
122.69		0	0.1	ls	rib						IC1_83.43	158	83.43	83.43
122.77		0	0.08	ls	sfn						IC1_83.75	158	83.75	83.75
122.82		0	0.05	ls	rib						IC1_84.35	160	84.35	84.35
122.9		0	0.08	qtz	smd	pln					IC1_84.65	161	84.65	84.65	0.0001324
123.23		0	0.33	ls	rib						IC1_84.95	161	84.95	84.95	0.0003602
123.59		0	0.36	si	shl				black	black	IC1_85.14	161	85.14	85.14	0.0002226
123.83		0	0.24	qtz	smd	wav					IC1_85.44	161	85.44	85.44	0.0001474
123.91		0	0.08	si	shl				black	black	IC1_85.74	162	85.74	85.74	9.72e-05
124.08		0	0.17	qtz	smd	wav					IC1_86.1	163	86.1	86.1	4.39e-05
124.11		0	0.03	si	shl				black	black	IC1_86.4	163	86.4	86.4	4.62e-05
124.19		0	0.08	qtz	smd						IC1_86.75	163	86.75	86.75	3.95e-05
124.51		0	0.32	si	shl				black	black, rib lenses	IC1_87.07	164	87.07	87.07	6.23e-05
124.62		0	0.11	qtz	sfn	sup					IC1_87.37	165	87.37	87.37	0.0003742
124.67		0	0.05	si	shl				black	black	IC1_87.67	166	87.67	87.67	0.0007124
124.75		0	0.08	ls	rib						IC1_87.97	166	87.97	87.97	0.0007096
125.11		0	0.36	si	shl				green	green	IC1_88.27	166	88.27	88.27	0.0003946
125.21		0	0.1	si	slt				green	green	IC1_88.57	167	88.57	88.57	0.0001058
125.29		0	0.08	ls	oo	skl					IC1_88.85	169	88.85	88.85
125.49		0	0.2	ls	rib						IC1_89.35	171	89.35	89.35	0.0001599
125.9		0	0.41	si	shl				green	green	IC1_89.65	171	89.65	89.65	0.000357
126.12		0	0.22	si	slt				green	green	IC1_89.95	171	89.95	89.95	0.0003684
126.19		0	0.07	ls	rib						IC1_90.25	171	90.25	90.25
126.48		0	0.29	ls	grn	strm				laterally oolite, cauli and digitate mounding up to 0.5 m thick	IC1_90.55	171	90.55	90.55	0.0003325
126.98		0	0.5	si	shl				black	black	IC1_90.85	171	90.85	90.85	0.0002634
127.2		0	0.22	ls	grn	mas					IC1_91.15	171	91.15	91.15	0.0002178
127.44		0	0.24	si	slt				green	green	IC1_91.45	171	91.45	91.45	0.0001226
127.57		0	0.13	ls	rib						IC1_91.75	171	91.75	91.75	8.4e-05
127.61		0	0.04	ls	shl						IC1_92.05	171	92.05	92.05	0.0001628
127.66		0	0.05	ls	rib						IC1_92.35	171	92.35	92.35	0.0001789
127.9		0	0.24	ls	oo						IC1_92.65	171	92.65	92.65	0.0001645
128.02		0	0.12	si	shl				black	black	IC1_92.95	171	92.95	92.95	9.4e-05
128.33		0	0.31	ls	grn						IC1_93.25	171	93.25	93.25	7.91e-05
128.97		0	0.64	si	slt						IC1_93.55	176	93.55	93.55
129.06		0	0.09	qtz	smd	sup					IC1_93.85	177	93.85	93.85	0.0001049
129.15		0	0.09	ls	oo						IC1_94.15	177	94.15	94.15	9.27e-05
129.3		0	0.15	ls	rib						IC1_94.45	177	94.45	94.45	9.66e-05
129.35		0	0.05	ls	oo						IC1_94.75	177	94.75	94.75	7.84e-05
129.5		0	0.15	si	shl				black		IC1_95.05	179	95.05	95.05	7.65e-05
129.73		0	0.23	ls	rib						IC1_95.41	182	95.41	95.41
129.87		0	0.14	si	shl				black		IC1_95.88	186	95.88	95.88
129.91		0	0.04	ls	rib						IC1_96.22	188	96.22	96.22
130.84		0	0.93	si	shl				black		IC1_96.45	189	96.45	96.45
130.91		0	0.07	ls	rib						IC1_96.77	189	96.77	96.77	0.0001399
131.02		0	0.11	si	shl				black		IC1_97.07	189	97.07	97.07	0.0001409
131.1		0	0.08	ls	rib						IC1_97.37	189	97.37	97.37	0.0002917
131.52		0	0.42	si	shl				black		IC1_97.67	189	97.67	97.67	0.0001975
131.7		0	0.18	ls	rib						IC1_97.97	189	97.97	97.97	0.0003067
131.82		0	0.12	si	shl				black		IC1_98.27	189	98.27	98.27	0.0003907
131.85		0	0.03	ls	rib						IC1_98.57	189	98.57	98.57	0.0003607
131.93		0	0.08	si	shl				black		IC1_98.87	189	98.87	98.87	0.0002444
131.98		0	0.05	ls	rib						IC1_99.17	189	99.17	99.17	0.0001696
132.49		0	0.51	si	shl						IC1_99.47	189	99.47	99.47	0.0001486
132.78		0	0.29	ls	rib						IC1_99.77	189	99.77	99.77	0.0001023
133.08		0	0.3	si	shl				black		IC1_100.07	189	100.07	100.07	0.0001173
133.57		0	0.49	ls	rib	cur					IC1_100.42	190	100.42	100.42
133.85		0	0.28	si	shl				black		IC1_100.69	190	100.69	100.69	0.0001064
134.17		0	0.32	ls	rib	wav					IC1_101.04	190	101.04	101.04
134.38		0	0.21	ls	oo	mas					IC1_101.29	190	101.29	101.29
134.56		0	0.18	si	shl				black		IC1_101.67	191	101.67	101.67	0.0001047
134.71		0	0.15	ls	rib				green		IC1_101.97	191	101.97	101.97	7.3e-05
135.32		0	0.61	si	slt				green		IC1_102.13	192	102.13	102.13
135.61		0	0.29	ls	grn						IC1_102.53	193	102.53	102.53	0.0001161
135.68		0	0.07	ls	rib						IC1_102.83	193	102.83	102.83	0.0001743
135.82		0	0.14	ls	oo						IC1_103.13	193	103.13	103.13	7.45e-05
136.33		0	0.51	si	shl				black		IC1_103.43	194	103.43	103.43
136.7		0	0.37	ls	mic	strm					IC1_103.7	195	103.7	103.7	8.99e-05
137.11		0	0.41	si	shl				black		IC1_104	195	104	104	0.000143
137.43		0	0.32	ls	rib						IC1_104.3	195	104.3	104.3	0.0001588
139.12		0	1.69	si	shl				black	black	IC1_104.6	195	104.6	104.6	0.0017677
139.4		0	0.28	ls	grn	mas					IC1_104.91	196	104.91	104.91	0.0017701
139.43		0	0.03	ls	rib						IC1_105.2	197	105.2	105.2	9.77e-05
142.73		0	3.3	si	shl				green	green	IC1_105.5	197	105.5	105.5	0.0001046
143.64		0	0.91	ls	rib	wav					IC1_105.8	197	105.8	105.8	7.94e-05
144.13		0	0.49	si	shl						IC1_106.1	197	106.1	106.1	7.79e-05
144.58		0	0.45	si	slt						IC1_106.29	198	106.29	106.29
144.7		0	0.12	ls	rib	vug					IC1_106.4	199	106.4	106.4	0.0001558
144.95		0	0.25	si	shl						IC1_106.7	199	106.7	106.7	0.0004012
145.09		0	0.14	ls	oo	mas; vug					IC1_107	199	107	107	0.000363
145.94		0	0.85	si	shl				black	black	IC1_107.3	199	107.3	107.3	0.0001839
146.1	0.1	0.1	0.16	ls	rib						IC1_107.6	199	107.6	107.6	0.0001527
146.16		0.1	0.06	si	shl						IC1_107.84	200	107.84	107.84
146.18		0.1	0.02	ls	rib						IC1_108.21	200	108.21	108.21
146.53		0.1	0.35	si	shl				black	black	IC1_108.5	201	108.5	108.5	0.0001181
146.55		0.1	0.02	ls	rib						IC1_108.8	201	108.8	108.8	0.000116
146.73		0.1	0.18	si	shl				green	green	IC1_109.1	201	109.1	109.1	8.38e-05
146.93		0.1	0.2	ls	rib						IC1_109.39	201	109.39	109.39	9.37e-05
147.08		0.1	0.15	ls	oo	wav					IC1_109.75	202	109.75	109.75
147.34		0.1	0.26	si	shl				black	black	IC1_110.1	202	110.1	110.1
147.58		0.1	0.24	qtz	smd	wav					IC1_110.4	202	110.4	110.4
148.11		0.1	0.53	si	shl				black	black	IC1_110.84	203	110.84	110.84	7.62e-05
148.14		0.1	0.03	ls	rib						IC1_111.7	204	111.7	111.7	8.07e-05
148.51		0.1	0.37	si	shl				black	black	IC1_112.94	205	112.94	112.94	0.0001211
149.54		0.1	1.03	ls	rib						IC1_113.24	205	113.24	113.24	0.0001094
149.69		0.1	0.15	ls	grn; oo						IC1_113.54	205	113.54	113.54	0.0001458
149.86		0.1	0.17	ls	rib						IC1_113.8	205	113.8	113.8	0.0002375
150.52		0.1	0.66	si	shl				black	black	IC1_113.84	205	113.84	113.84	0.0001176
151.09		0.1	0.57	ls	rib	wav					IC1_114.1	205	114.1	114.1	0.0001264
151.23		0.1	0.14	ls	grn						IC1_114.14	205	114.14	114.14	0.0001452
151.28		0.1	0.05	si	shl						IC1_114.4	205	114.4	114.4	0.0001456
151.43		0.1	0.15	qtz	sfn	wav					IC1_114.44	205	114.44	114.44	0.0001144
152.35		0.1	0.92	si	shl				black	black	IC1_114.7	206	114.7	114.7	9.94e-05
153.07		0.1	0.72	ls	rib						IC1_114.74	206	114.74	114.74	0.0001283
153.51		0.1	0.44	si	shl				black	black	IC1_115	208	114.99	114.99	9.19e-05
153.61		0.1	0.1	ls	grn	vug					IC1_115.06	209	115.06	115.06
153.66		0.1	0.05	ls	rib						IC1_115.3	210	115.3	115.3	0.000104
153.91		0.1	0.25	si	shl				black	black	IC1_115.34	210	115.34	115.34	0.000124
154.71		0.1	0.8	ls	rib						IC1_115.5	211	115.5	115.5	5.28e-05
154.85		0.1	0.14	COVER							IC1_115.6	211	115.6	115.6	9.3e-05
155.13		0.1	0.28	ls	rib	wav					IC1_115.74	211	115.74	115.74
155.61		0.1	0.48	si	shl				black	black	IC1_115.9	212	115.9	115.9	9.9e-05
155.9		0.1	0.29	ls	rib						IC1_115.94	212	115.94	115.94	0.0001043
156.58		0.1	0.68	si	slt				green	green	IC1_116.2	212	116.2	116.2	6.92e-05
156.9		0.1	0.32	ls	rib						IC1_116.24	212	116.24	116.24	0.0001019
157.44		0.1	0.54	ls	rib						IC1_116.5	212	116.5	116.5	0.0001137
158.93		0.1	1.49	ls	rib						IC1_116.54	212	116.54	116.54	0.0001167
159.08		0.1	0.15	si	shl						IC1_116.8	212	116.8	116.8	0.000113
159.18		0.1	0.1	ls	rib						IC1_116.84	212	116.84	116.84	0.0001018
159.73		0.1	0.55	si	shl				black	black	IC1_117.1	213	117.07	117.07	0.0001552
159.88		0.1	0.15	ls	rib						IC1_117.14	214	117.14	117.14
160.17		0.1	0.29	si	shl				black	black	IC1_117.4	217	117.4	117.4	8.71e-05
160.31		0.1	0.14	ls	rib						IC1_117.44	217	117.44	117.44	0.0001594
160.61		0.1	0.3	ls	rib						IC1_117.7	217	117.7	117.7	0.0001233
160.67		0.1	0.06	si	shl				black	black	IC1_117.74	217	117.74	117.74	0.0001546
160.88		0.1	0.21	ls	rib						IC1_118	217	118	118	9.18e-05
161.31		0.1	0.43	si	shl				black	black	IC1_118.04	217	118.04	118.04	9.49e-05
161.44		0.1	0.13	ls	rib						IC1_118.3	217	118.3	118.3	9.61e-05
161.47		0.1	0.03	si	shl				black	black	IC1_118.34	217	118.34	118.34	7.27e-05
161.71		0.1	0.24	ls	rib						IC1_118.64	217	118.64	118.64
163.07		0.1	1.36	si	shl				blue	blue	IC1_119	219	119	119
163.44		0.1	0.37	COVER					orange	orange	IC1_119.35	219	119.35	119.35	0.0001104
164.41		0.1	0.97	si	shl				black	black	IC1_119.65	221	119.65	119.65	0.0001067
164.52		0.1	0.11	ls	rib						IC1_119.95	221	119.95	119.95
165.58		0.1	1.06	si	shl				black	black	IC1_120.25	222	120.25	120.25	9.45e-05
165.99		0.1	0.41	COVER					orange	orange	IC1_120.55	223	120.55	120.55
166.64		0.1	0.65	si	shl				green	green	IC1_120.85	224	120.85	120.85	0.0001297
166.79		0.1	0.15	ls	rib						IC1_121	226	121	121
168.39		0.1	1.6	si	shl				black	black	IC1_121.15	226	121.15	121.15	0.0001056
168.5		0.1	0.11	COVER		vug			orange	orange	IC1_121.45	226	121.42	121.42	0.0001375
168.69		0.1	0.19	si	shl				green	green	IC1_121.75	229	121.75	121.75	0.0001178
168.81		0.1	0.12	qtz	smd	pln					IC1_122.05	229	122.05	122.05	9.7e-05
169.8		0.1	0.99	si	shl				green	green	IC1_122.35	229	122.35	122.35	7.01e-05
169.96		0.1	0.16	ls	rib						IC1_122.65	231	122.65	122.65	8.95e-05
170.34		0.1	0.38	si	slt						IC1_122.95	235	122.95	122.95
170.6		0.1	0.26	ls	rib						IC1_123.23	235	123.23	123.23
170.66		0.1	0.06	ls	rib						IC1_123.55	236	123.55	123.55	0.0001183
170.75		0.1	0.09	si	shl						IC1_123.9	238	123.9	123.9
170.81	0.01	0.11	0.06	ls	oo						IC1_124.1	240	124.1	124.1
171.24		0.11	0.43	si	shl				black	black	IC1_124.4	242	124.4	124.4	6.11e-05
171.61		0.11	0.37	ls	rib						IC1_124.53	243	124.53	124.53
171.73		0.11	0.12	ls	oo	mas					IC1_124.7	244	124.67	124.67	6.11e-05
172.21		0.11	0.48	si	shl				black	black	IC1_125.05	246	125.05	125.05	0.0001642
172.32		0.11	0.11	ls	rib						IC1_125.2	247	125.2	125.2
172.34		0.11	0.02	ls	oo						IC1_125.35	249	125.35	125.35	9.63e-05
172.43		0.11	0.09	qtz	smd	pln					IC1_125.65	250	125.65	125.65	0.000163
173.45		0.11	1.02	si	shl				black	black	IC1_125.95	251	125.95	125.95	0.0001232
173.51		0.11	0.06	si	slt						IC1_126.25	253	126.25	126.25
173.7		0.11	0.19	ls	rib						IC1_126.5	253	126.5	126.5
173.96		0.11	0.26	ls	rib	wav	lod				IC1_126.55	254	126.55	126.55	0.0001014
174.57		0.11	0.61	si	shl				black	black	IC1_126.85	254	126.85	126.85	0.0001056
174.66		0.11	0.09	si	slt				green	green	IC1_127.02	255	127.02	127.02
174.73		0.11	0.07	ls	rib						IC1_127.15	255	127.15	127.15	0.000231
174.77		0.11	0.04	ls	grn						IC1_127.4	256	127.4	127.4
174.8		0.11	0.03	si	shl						IC1_127.67	260	127.67	127.67
174.98		0.11	0.18	ls	grn	sup					IC1_127.97	261	127.97	127.97	0.0001592
175.54	0.12	0.23	0.56	si	shl						IC1_128.27	262	128.27	128.27	0.0001648
176.01		0.23	0.47	ls	grn	wav					IC1_128.57	263	128.57	128.57	0.0001399
176.99		0.23	0.98	si	shl						IC1_128.85	263	128.85	128.85	0.0001205
177.14	0.1	0.33	0.15	ls	grn	wav					IC1_129.15	265	129.15	129.15
177.18		0.33	0.04	ls	oo						IC1_129.2	266	129.2	129.2	7.09e-05
177.75		0.33	0.57	si	shl				black	black	IC1_129.25	267	129.25	129.25
177.8		0.33	0.05	ls	rib						IC1_129.45	268	129.45	129.45	9.2e-05
178.4		0.33	0.6	si	shl				black	black	IC1_129.55	269	129.55	129.55
178.53		0.33	0.13	ls	rib	wav					IC1_129.85	271	129.85	129.85
178.62		0.33	0.09	ls	grn	mas					IC1_130.15	272	130.15	130.15	9.84e-05
178.73		0.33	0.11	COVER							IC1_130.45	272	130.45	130.45	0.000114
178.99		0.33	0.26	ls	rib	wav					IC1_130.75	273	130.75	130.75	0.0001223
180.27		0.33	1.28	si	shl						IC1_130.85	273	130.85	130.85
180.65		0.33	0.38	ls	grn	mas					IC1_131.05	275	131.05	131.05
180.97		0.33	0.32	ls	rib						IC1_131.35	276	131.35	131.35	0.0001047
181.87		0.33	0.9	si	shl				black	black	IC1_131.65	277	131.65	131.65
181.98		0.33	0.11	ls	rib						IC1_131.95	280	131.93	131.93	0.0001281
182.4		0.33	0.42	si	shl				green	green	IC1_132.05	282	132.05	132.05	0.000127
182.69		0.33	0.29	ls	rib						IC1_132.25	282	132.25	132.25	0.0001273
183.39		0.33	0.7	ls	rib						IC1_132.55	283	132.55	132.55
183.89		0.33	0.5	si	shl				black	black	IC1_132.85	284	132.85	132.85	9.94e-05
184.35		0.33	0.46	ls	rib						IC1_133.15	285	133.15	133.15
187.25		0.33	2.9	si	shl				black	black	IC1_133.45	285	133.45	133.45
187.6		0.33	0.35	ls	grn	sup					IC1_133.75	286	133.75	133.75	0.0001324
187.64		0.33	0.04	COVER				rs			IC1_133.85	287	133.85	133.85
187.71		0.33	0.07	ls	rib						IC1_133.95	287	133.95	133.95
187.72		0.33	0.01	si	shl						IC1_134.25	288	134.25	134.25
187.81		0.33	0.09	ls	oo	sk					IC1_134.35	289	134.38	134.38	0.0001477
187.85		0.33	0.04	ls	rib						IC1_134.65	290	134.65	134.65	0.0001468
189.19	-1	-0.67	1.34	si	shl				black	black	IC1_134.95	291	134.95	134.95	0.0001506
189.45		-0.67	0.26	ls	oo	wav; skl					IC1_135.25	291	135.25	135.25	0.0001414
189.48		-0.67	0.03	si	shl						IC1_135.55	292	135.55	135.55
189.52		-0.67	0.04	ls	rib						IC1_135.6	292	135.6	135.6
189.53		-0.67	0.01	si	shl						IC1_136.85	295	136.85	136.85	0.0001036
189.61		-0.67	0.08	ls	rib						IC1_136.15	295	136.15	136.15	0.0001083
189.98		-0.67	0.37	si	shl				black	black	IC1_136.45	296	136.45	136.45
191.63		-0.67	1.65	ls	rib						IC1_136.75	297	136.75	136.75	0.0001214
195.91		-0.67	4.28	si	shl				black	black	IC1_137.15	298	137.15	137.15
196.17		-0.67	0.26	ls	rib						IC1_137.35	298	137.35	137.35	0.0001178
196.25		-0.67	0.08	ls	oo						IC1_137.65	299	137.65	137.65	0.000122
196.38		-0.67	0.13	ls	rib						IC1_137.95	299	137.95	137.95	0.0001096
197.76		-0.67	1.38	si	shl				green	green	IC1_138.85	299	138.85	138.85	0.0001769
198.22		-0.67	0.46	ls	rib						IC1_139.15	299	139.12	139.12	0.000187
200.03		-0.67	1.81	si	shl				green	green	IC1_139.5	302	139.5	139.5
200.41		-0.67	0.38	ls	oo	mas; skl					IC1_139.75	302	139.75	139.75	0.0001373
201.36		-0.67	0.95	si	shl		lod		green	green	IC1_140.05	302	140.05	140.05	0.0001388
201.42		-0.67	0.06	ls	rib						IC1_140.1	302	140.1	140.1
202.04		-0.67	0.62	si	shl				green	green	IC1_140.35	302	140.35	140.35	0.0001355
202.57		-0.67	0.53	ls	oo	mas					IC1_140.65	302	140.65	140.65	0.0001366
202.64		-0.67	0.07	si	shl				black	black	IC1_140.95	302	140.95	140.95	0.0001648
202.67		-0.67	0.03	ls	rib						IC1_141.25	302	141.25	141.25	0.0001725
202.91		-0.67	0.24	si	shl				black	black	IC1_141.55	302	141.55	141.55	0.0001484
202.97		-0.67	0.06	ls	rib						IC1_141.85	302	141.85	141.85	0.0001809
205.59		-0.67	2.62	si	shl				green	green	IC1_142.15	302	142.15	142.15	0.0001779
206.14		-0.67	0.55	COVER							IC1_142.45	302	142.45	142.45	0.0001648
207.5		-0.67	1.36	si	shl				green	green	IC1_142.75	302	142.73	142.73	0.0001898
207.76		-0.67	0.26	ls	oo						IC1_143.1	303	143.1	143.1
207.84		-0.67	0.08	ls	rib						IC1_143.65	304	143.65	143.65	0.000142
207.87		-0.67	0.03	si	shl						IC1_143.95	304	143.95	143.95	0.0001385
207.93		-0.67	0.06	ls	rib						IC1_144.28	305	144.28	144.28
208.44		-0.67	0.51	si	shl				olive	olive	IC1_144.6	307	144.6	144.6
208.97		-0.67	0.53	ls	rib						IC1_144.98	308	144.98	144.98
209.3		-0.67	0.33	ls	oo						IC1_145.15	309	145.15	145.15	0.0001025
210.05		-0.67	0.75	si	shl				green	green	IC1_145.45	309	145.45	145.45	0.0001173
210.44		-0.67	0.39	ls	grn						IC1_145.75	309	145.75	145.75	0.0001378
210.59		-0.67	0.15	ls	rib						IC1_146.05	311	146.05	146.15	0.0001493
211.31	0.04	-0.63	0.72	si	shl				green	green	IC1_146.35	313	146.35	146.45	0.0001609
211.39		-0.63	0.08	ls	rib						IC1_146.43	314	146.43	146.53
211.6		-0.63	0.21	si	slt						IC1_146.65	316	146.65	146.75
211.91		-0.63	0.31	si	shl						IC1_146.95	318	146.98	147.08	0.0001189
212.62		-0.63	0.71	ls	grn						IC1_147.38	319	147.38	147.48
212.79		-0.63	0.17	si	shl				grey	grey	IC1_147.55	320	147.55	147.65	9.98e-05
212.84		-0.63	0.05	ls	rib						IC1_147.85	320	147.85	147.95	8.27e-05
213.37	0.06	-0.57	0.53	si	shl				green	green	IC1_147.98	320	147.98	148.08	8.66e-05
213.64		-0.57	0.27	si	cht						IC1_148.15	322	148.15	148.25	0.0001039
214.92		-0.57	1.28	si	shl				olive	olive	IC1_148.4	322	148.4	148.5
214.97		-0.57	0.05	COVER							IC1_148.75	322	148.75	148.85	0.0001506
215.01		-0.57	0.04	ls	rib						IC1_149.1	323	149.1	149.2
215.32		-0.57	0.31	si	shl				olive	olive	IC1_149.35	323	149.35	149.45
216.25	0.06	-0.51	0.93	ls	grn	skl					IC1_149.59	324	149.59	149.69
217.3		-0.51	1.05	si	shl				olive	olive	IC1_149.65	325	149.65	149.75	0.0001355
217.76		-0.51	0.46	ls	rib						IC1_149.95	326	149.95	150.05	7.22e-05
217.85		-0.51	0.09	si	shl						IC1_150.25	326	150.25	150.35	0.0001203
218.14		-0.51	0.29	ls	grn						IC1_150.55	326	150.55	150.65
218.26		-0.51	0.12	ls	grn						IC1_150.85	327	150.85	150.95	0.0001208
218.5		-0.51	0.24	ls	coq						IC1_151.05	328	151.05	151.15
219.05		-0.51	0.55	si	shl				green	green	IC1_151.1	328	151.1	151.2
219.11		-0.51	0.06	ls	rib						IC1_151.25	330	151.25	151.35
219.31		-0.51	0.2	si	shl				green	green	IC1_151.45	331	151.45	151.55	0.000101
219.41		-0.51	0.1	ls	oo						IC1_151.75	331	151.75	151.85	0.0001007
219.47		-0.51	0.06	si	shl						IC1_152.05	331	152.05	152.15	0.000113
219.54		-0.51	0.07	ls	oo	skl					IC1_152.35	332	152.35	152.45
219.56		-0.51	0.02	si	shl						IC1_152.73	332	152.73	152.83
219.63		-0.51	0.07	ls	rib						IC1_152.95	333	152.97	153.07	0.0001411
220.82		-0.51	1.19	si	shl				green	green	IC1_153.25	333	153.25	153.35	0.0001131
220.97		-0.51	0.15	si	slt				green	green	IC1_153.5	334	153.5	153.6
221.25		-0.51	0.28	ls	grn						IC1_153.85	336	153.81	153.91	0.0001545
221.27		-0.51	0.02	si	shl						IC1_154.15	337	154.15	154.25	0.0001486
221.76		-0.51	0.49	ls	grn	skl					IC1_154.47	337	154.47	154.57	0.0001559
222.07		-0.51	0.31	si	shl				green	green	IC1_154.79	339	154.79	154.89
222.1		-0.51	0.03	ls	rib						IC1_155.05	340	155.05	155.15	0.0001274
222.39		-0.51	0.29	si	shl				olive	olive	IC1_155.35	340	155.35	155.45	0.0001159
222.99		-0.51	0.6	ls	rib	par					IC1_155.65	341	155.65	155.75
223.21		-0.51	0.22	si	shl				olive	olive	IC1_155.95	342	155.95	156.05	0.0001573
223.3		-0.51	0.09	ls	oo	skl					IC1_156.25	342	156.25	156.35	0.0002065
223.65		-0.51	0.35	si	shl				olive	olive	IC1_156.55	343	156.55	156.65	0.0001231
223.72		-0.51	0.07	ls	mic						IC1_156.7	343	156.7	156.8
223.79		-0.51	0.07	si	shl				olive	olive	IC1_156.85	344	156.85	156.95	0.0002667
224.03		-0.51	0.24	ls	grn	skl					IC1_157.15	344	157.15	157.25	8e-05
224.12		-0.51	0.09	COVER							IC1_157.45	345	157.45	157.55	0.0001488
224.26		-0.51	0.14	ls	grn						IC1_157.7	345	157.7	157.8	8.9e-05
225.36		-0.51	1.1	si	shl				olive	olive	IC1_158.1	345	158.1	158.2
225.39		-0.51	0.03	ls	mic						IC1_158.65	345	158.65	158.75
225.49		-0.51	0.1	si	shl				olive	olive	IC1_158.95	346	158.95	159.05	0.0001237
225.54		-0.51	0.05	ls	mic						IC1_159.25	348	159.25	159.35	0.0001174
225.94		-0.51	0.4	si	shl				olive	olive	IC1_159.55	348	159.55	159.65	0.0001067
226.25		-0.51	0.31	ls	grn	sup					IC1_159.85	349	159.85	159.95	0.0001147
226.81		-0.51	0.56	si	shl				black	black	IC1_160.1	351	160.1	160.2
227.05		-0.51	0.24	ls	grn	skl					IC1_160.45	352	160.45	160.55	0.0001019
227.8		-0.51	0.75	si	shl				black	black	IC1_160.6	354	160.6	160.7
228.22		-0.51	0.42	ls	grn	wav					IC1_160.85	355	160.85	160.95	0.000103
228.25		-0.51	0.03	si	shl				black	black	IC1_161.05	355	161.05	161.15	0.0001239
228.31		-0.51	0.06	ls	grn						IC1_161.32	356	161.32	161.42
228.63		-0.51	0.32	si	shl				black	black	IC1_161.64	359	161.64	161.74	0.0001149
230.84		-0.51	2.21	si	shl				olive	olive	IC1_161.94	359	161.94	162.04	0.0001118
231.21		-0.51	0.37	COVER							IC1_162.24	359	162.24	162.34	0.0001261
232.62		-0.51	1.41	si	shl				olive	olive	IC1_162.54	359	162.54	162.64	0.0001454
232.7		-0.51	0.08	si	slt				black	black	IC1_162.84	359	162.84	162.94	0.0001752
232.99	0.01	-0.5	0.29	si	shl				black	black	IC1_163.19	360	163.19	163.29	0.0001356
233.02		-0.5	0.03	si	shl				black	black	IC1_163.46	361	163.46	163.56	0.000202
234.22	0.4	-0.1	1.2	si	shl				black	black	IC1_163.74	361	163.74	163.84	0.000212
234.47		-0.1	0.25	si	slt						IC1_164.04	361	164.04	164.14	0.0001629
236.13		-0.1	1.66	si	shl				olive	olive	IC1_164.34	361	164.31	164.41	0.0001365
236.42		-0.1	0.29	ls	rib						IC1_164.6	363	164.6	164.7	0.0001445
237.22		-0.1	0.8	si	shl				olive	olive	IC1_165.1	363	165.1	165.2	0.0001712
237.33		-0.1	0.11	ls	rib						IC1_165.4	363	165.4	165.5	0.000174
237.49		-0.1	0.16	ls	grn						IC1_165.6	364	165.6	165.7	5.13e-05
238.28		-0.1	0.79	si	shl		lod		olive	olive	IC1_165.78	364	165.78	165.88	0.0011963
238.33		-0.1	0.05	ls	mic						IC1_165.9	364	165.9	166	0.0003874
238.36		-0.1	0.03	ls	grn	skl					IC1_166.08	365	166.08	166.18	0.0005764
238.41		-0.1	0.05	ls	rib						IC1_166.38	365	166.38	166.48	0.0006685
238.58		-0.1	0.17	ls	grn	vug					IC1_166.61	366	166.61	166.71
238.88		-0.1	0.3	ls	grn	skl; mas					IC1_166.98	367	166.98	167.08	0.0001238
239.59		-0.1	0.71	si	shl				olive	olive	IC1_167.28	367	167.28	167.38	0.0001361
239.65		-0.1	0.06	ls	rib						IC1_167.58	367	167.58	167.68	0.0001306
239.8		-0.1	0.15	si	shl				olive	olive	IC1_167.88	367	167.88	167.98	0.0001072
239.86		-0.1	0.06	ls	rib						IC1_168.18	367	168.18	168.28	0.000101
239.94		-0.1	0.08	si	shl				olive	olive	IC1_168.38	368	168.38	168.48	0.0001133
239.99		-0.1	0.05	ls	rib						IC1_168.4	368	168.4	168.5	0.0001571
240.16		-0.1	0.17	si	shl				olive	olive	IC1_168.68	370	168.68	168.78
240.42		-0.1	0.26	ls	grn	skl; bio					IC1_169.08	371	169.08	169.18	0.0001237
241.08		-0.1	0.66	si	shl				olive	olive	IC1_169.38	371	169.38	169.48
242.39		-0.1	1.31	si	shl				olive	olive	IC1_169.86	372	169.86	169.96
242.44		-0.1	0.05	ls	rib						IC1_169.98	373	169.98	170.08	9.97e-05
242.93		-0.1	0.49	si	shl				olive	olive	IC1_170.3	374	170.3	170.4
242.96		-0.1	0.03	ls	mic						IC1_170.6	376	170.6	170.7	0.0001187
243.34		-0.1	0.38	si	shl		lod		olive	olive	IC1_170.8	378	170.8	170.91	0.0001535
243.49	-0.1	-0.2	0.15	ls	oo						IC1_171.1	379	171.1	171.21	0.0001346
244.87		-0.2	1.38	si	shl		lod		black	black	IC1_171.5	379	171.5	171.61
244.92		-0.2	0.05	ls	rib		lod				IC1_171.64	381	171.64	171.75
245.32		-0.2	0.4	ls	oo	mas					IC1_171.94	381	171.94	172.05
246.16		-0.2	0.84	si	shl				olive	olive	IC1_172.07	381	172.07	172.18
246.54		-0.2	0.38	COVER							IC1_172.18	382	172.18	172.29
246.87		-0.2	0.33	si	shl				black	black	IC1_172.42	385	172.42	172.53
246.99		-0.2	0.12	ls	rib						IC1_172.74	385	172.74	172.85	0.0001118
250		-0.2	3.01	si	shl				black	black	IC1_173.04	385	173.04	173.15	0.0001341
250.21		-0.2	0.21	ls	grn	vug					IC1_173.34	385	173.34	173.45	0.0001082
250.28		-0.2	0.07	ls	rib						IC1_173.64	388	173.64	173.75
251.1		-0.2	0.82	si	shl				olive	olive	IC1_173.94	389	173.94	174.05
251.15		-0.2	0.05	ls	rib						IC1_174.24	389	174.24	174.35	0.0001196
252.18		-0.2	1.03	si	shl				olive	olive	IC1_174.54	390	174.54	174.65
252.25		-0.2	0.07	ls	mic						IC1_174.84	394	174.84	174.95
252.3		-0.2	0.05	ls	grn	skl					IC1_175.14	395	175.14	175.37	0.0001095
252.71		-0.2	0.41	si	shl				blue	blue	IC1_175.44	396	175.44	175.67	5.73e-05
252.85		-0.2	0.14	ls	grn	vug					IC1_175.74	397	175.78	176.01	0.0001047
252.96		-0.2	0.11	si	shl				olive	olive	IC1_176.04	397	176.04	176.27	0.0001085
253.06		-0.2	0.1	ls	slt						IC1_176.34	397	176.34	176.57	0.0001036
253.18		-0.2	0.12	si	shl				olive	olive	IC1_176.64	397	176.64	176.87	0.0001228
253.44		-0.2	0.26	ls	grn						IC1_176.8	398	176.8	177.13
254.03		-0.2	0.59	si	shl				olive	olive	IC1_176.94	400	176.94	177.27
254.08		-0.2	0.05	ls	mic						IC1_177.24	400	177.24	177.57	0.0001104
254.31		-0.2	0.23	ls	grn	skl; vug					IC1_177.54	401	177.54	177.87
254.34		-0.2	0.03	si	shl				black	black	IC1_177.84	402	177.84	178.17	0.0001357
254.75		-0.2	0.41	ls	grn	skl					IC1_178.14	403	178.14	178.47
254.84		-0.2	0.09	si	shl				black	black	IC1_178.27	404	178.27	178.6
254.89		-0.2	0.05	ls	grn	skl					IC1_178.56	406	178.56	178.89
254.92		-0.2	0.03	si	shl				black	black	IC1_178.86	407	178.86	179.19	0.0001394
255.06		-0.2	0.14	ls	grn	skl; vug; mc					IC1_179.16	407	179.16	179.49	0.0001287
255.12		-0.2	0.06	si	shl				black	black	IC1_179.46	407	179.46	179.79	0.0001052
255.15		-0.2	0.03	ls	rib	skl					IC1_179.64	407	179.64	179.97	0.0001112
255.21		-0.2	0.06	si	shl				black	black	IC1_179.94	407	179.94	180.27
255.26		-0.2	0.05	ls	grn	skl					IC1_180.29	408	180.29	180.62
255.3		-0.2	0.04	si	shl				black	black	IC1_180.59	409	180.59	180.92
255.35		-0.2	0.05	ls	grn	skl					IC1_180.84	410	180.84	181.17	0.0001111
255.36		-0.2	0.01	si	shl				black	black	IC1_181.14	410	181.14	181.47	9.26e-05
255.38		-0.2	0.02	ls	rib	skl					IC1_181.64	411	181.64	181.97
256.05		-0.2	0.67	si	shl				olive	olive	IC1_181.94	411	181.94	182.27	0.0001266
256.13		-0.2	0.08	ls	mic						IC1_182.24	413	182.24	182.57	0.0001029
257.23		-0.2	1.1	si	shl				olive	olive	IC1_182.54	414	182.54	182.87	7.98e-05
257.44		-0.2	0.21	ls	grn	skl					IC1_182.84	414	182.84	183.17
257.54		-0.2	0.1	si	shl				black	black	IC1_183.15	415	183.15	183.48	0.0001476
257.63		-0.2	0.09	ls	rib						IC1_183.45	415	183.45	183.78	0.0001541
260.02		-0.2	2.39	si	shl				olive	olive	IC1_183.88	416	183.88	184.21
260.1		-0.2	0.08	ls	mic						IC1_184.05	417	184.05	184.38	0.0001405
260.25		-0.2	0.15	ls	grn	skl					IC1_184.34	417	184.34	184.67	9.6e-05
260.28		-0.2	0.03	ls	rib						IC1_184.65	417	184.65	184.98	0.000139
261.59		-0.2	1.31	si	shl				black	black	IC1_184.95	417	184.95	185.28	0.0001277
261.74		-0.2	0.15	ls	rib						IC1_185.25	417	185.25	185.58	0.0001408
261.82		-0.2	0.08	ls	rib						IC1_185.55	417	185.55	185.88	0.0001275
262.26		-0.2	0.44	si	shl				olive	olive	IC1_185.85	417	185.85	186.18	0.0001094
262.39		-0.2	0.13	ls	mic						IC1_186.15	417	186.15	186.48	0.0001125
262.63		-0.2	0.24	ls	coq						IC1_186.45	417	186.45	186.78	0.0001435
264.88		-0.2	2.25	si	shl				black	black	IC1_186.75	417	186.75	187.08	0.0001006
264.96		-0.2	0.08	ls	grn	biv					IC1_187.05	418	187.05	187.38
265.04		-0.2	0.08	ls	rib						IC1_187.4	422	187.4	187.73
265.19		-0.2	0.15	ls	grn	biv					IC1_187.65	424	187.65	186.98	0.000136
268.19		-0.2	3	si	shl				purple	purple	IC1_187.95	424	187.95	187.28	0.0001289
268.69		-0.2	0.5	si	slt				green	green	IC1_188.25	424	188.25	187.58	0.0001287
268.9		-0.2	0.21	si	shl				olive	olive	IC1_188.55	424	188.55	187.88	0.0001497
269.03		-0.2	0.13	COVER							IC1_188.85	424	188.85	188.18	0.0001544
269.35		-0.2	0.32	ls	grn	sup					IC1_189.18	424	189.18	188.51
269.4		-0.2	0.05	ls	rib	vug					IC1_189.45	424	189.45	188.78	0.0001247
271.17		-0.2	1.77	si	shl				purple	purple	IC1_189.75	424	189.75	189.08	0.000111
271.5		-0.2	0.33	si	slt				olive	olive	IC1_190.05	425	190.05	189.38
271.83		-0.2	0.33	si	shl				olive	olive	IC1_190.18	427	190.18	189.51
272.13		-0.2	0.3	ls	grn	biv; mas					IC1_190.35	430	190.35	189.68	0.0001006
272.53		-0.2	0.4	si	slt				olive	olive	IC1_190.72	431	190.72	190.05	0.0001105
272.95		-0.2	0.42	si	shl				olive	olive	IC1_191.02	431	191.02	190.35	6.42e-05
273.07		-0.2	0.12	ls	grn	skl; mas					IC1_191.32	432	191.32	190.65	9.04e-05
273.21		-0.2	0.14	ls	rib				green	green	IC1_191.62	432	191.62	190.95	7.8e-05
274.15		-0.2	0.94	si	shl				olive	olive	IC1_191.92	432	191.92	191.25	0.0001037
274.33		-0.2	0.18	ls	rib						IC1_192.22	432	192.22	191.55	0.0001249
274.44		-0.2	0.11	ls	rib						IC1_192.52	432	192.52	191.85	0.000127
274.64		-0.2	0.2	ls	grn	wav					IC1_192.82	432	192.82	192.15	0.0001168
275.05		-0.2	0.41	ls	rib						IC1_193.12	432	193.12	192.45	0.000174
276.8		-0.2	1.75	si	shl				olive	olive	IC1_193.42	432	193.42	192.75	0.0001401
277		-0.2	0.2	ls	rib						IC1_193.72	432	193.72	193.05	0.0001333
278.61		-0.2	1.61	si	shl				olive	olive	IC1_194.02	432	194.02	193.35	0.0001528
278.73		-0.2	0.12	ls	grn	skl; biv; mas					IC1_194.32	432	194.32	193.65	0.0001455
278.79		-0.2	0.06	ls	rib						IC1_194.62	432	194.62	193.95	0.0001521
278.82		-0.2	0.03	si	shl				black	black	IC1_194.92	432	194.92	194.25	0.0001588
278.89		-0.2	0.07	ls	rib						IC1_195.22	432	195.22	194.55	0.0001648
279.22		-0.2	0.33	si	shl				black	black	IC1_195.52	432	195.52	194.85	0.0001742
279.25		-0.2	0.03	ls	rib						IC1_195.82	432	195.82	195.15	0.0001499
279.68		-0.2	0.43	si	shl				olive	olive	IC1_196.12	432	196.12	195.45	0.0001733
279.76		-0.2	0.08	si	slt				green	green	IC1_196.42	432	196.42	195.75	0.000155
280.09		-0.2	0.33	ls	rib						IC1_196.72	433	196.72	196.05
280.17		-0.2	0.08	ls	grn	vug					IC1_197.02	436	197.05	196.38	0.0001327
281.73		-0.2	1.56	si	shl				black	black	IC1_197.32	436	197.32	196.65	0.0001315
281.92		-0.2	0.19	ls	rib						IC1_197.62	436	197.62	196.95	0.0001461
282		-0.2	0.08	si	slt						IC1_197.92	436	197.92	197.25	0.0001424
282.03		-0.2	0.03	ls	rib						IC1_198.22	436	198.22	197.55	0.0001321
282.06		-0.2	0.03	ls	rib	vug					IC1_198.52	437	198.52	197.85
282.27		-0.2	0.21	ls	rib	bio					IC1_198.92	438	198.92	198.25	0.0001246
283.9		-0.2	1.63	si	shl				olive	olive	IC1_199.12	438	199.12	198.45	0.0001206
284.01		-0.2	0.11	ls	oo	par					IC1_199.42	438	199.42	198.75	0.0001346
286.72		-0.2	2.71	si	shl				olive	olive	IC1_199.72	438	199.72	199.05	0.0001392
286.89		-0.2	0.17	ls	rib	skl					IC1_200.02	438	200.02	199.35	0.0001465
287.45		-0.2	0.56	ls	coq	biv					IC1_200.32	438	200.32	199.65	0.000184
287.58		-0.2	0.13	si	shl				black	black	IC1_200.62	439	200.62	199.95	0.0001395
287.94		-0.2	0.36	ls	rib	vug; bio					IC1_200.92	439	200.92	200.25	2.85e-05
288.29		-0.2	0.35	si	shl				olive	olive	IC1_201.38	440	201.38	200.71	0.0001121
288.31		-0.2	0.02	ls	coq						IC1_201.68	440	201.68	201.01	0.0001468
291.98		-0.2	3.67	si	shl				olive	olive	IC1_201.98	440	201.98	201.31	0.0001352
292.19		-0.2	0.21	ls	mic						IC1_202.28	442	202.28	201.61	0.0001428
292.38		-0.2	0.19	ls	coq	biv					IC1_202.58	442	202.58	201.91	0.0001205
292.84		-0.2	0.46	ls	coq	vug					IC1_202.88	443	202.88	202.21
293.4		-0.2	0.56	si	shl				olive	olive	IC1_203.18	443	203.18	202.51
293.43		-0.2	0.03	ls	coq	biv					IC1_203.48	446	203.48	202.81	4.68e-05
293.49		-0.2	0.06	si	shl				olive	olive	IC1_203.78	448	203.78	203.11	0.0001156
293.53		-0.2	0.04	ls	coq	biv					IC1_204.08	448	204.08	203.41	0.0001185
293.58		-0.2	0.05	si	shl				olive	olive	IC1_204.38	448	204.38	203.71	0.0001141
293.82		-0.2	0.24	ls	coq	biv					IC1_204.68	448	204.68	204.01	0.0001029
295.38		-0.2	1.56	si	shl				olive	olive	IC1_204.98	448	204.98	204.31	0.0002031
295.42		-0.2	0.04	ls	rib	vug					IC1_205.28	448	205.28	204.61	0.0001714
295.73	0.02	-0.18	0.31	si	shl				olive	olive	IC1_205.58	448	205.58	204.91	0.0001392
295.82		-0.18	0.09	ls	coq						IC1_205.88	448	205.88	205.21	0.0001317
296.99		-0.18	1.17	si	shl				olive	olive	IC1_206.28	449	206.28	205.61
297.07		-0.18	0.08	ls	mic						IC1_206.51	449	206.51	205.84
297.11		-0.18	0.04	ls	coq						IC1_206.79	449	206.79	206.12
297.27		-0.18	0.16	ls	mic						IC1_207.11	450	207.11	206.44	0.0001253
299.47	0.4	0.22	2.2	si	shl				purple	purple	IC1_207.41	450	207.41	206.74	0.0001507
299.68		0.22	0.21	ls	coq	biv					IC1_207.71	450	207.71	207.04	0.0001097
299.74		0.22	0.06	si	shl				black	black	IC1_208.01	450	208.01	207.34	0.000125
299.82		0.22	0.08	ls	coq						IC1_208.2	451	208.2	207.53
299.84		0.22	0.02	si	shl				black	black	IC1_208.55	454	208.55	207.88
299.89		0.22	0.05	ls	coq						IC1_208.9	455	208.9	208.23	0.0001343
299.91		0.22	0.02	si	shl				black	black	IC1_209.2	456	209.2	208.53
300.1		0.22	0.19	ls	coq	biv					IC1_209.55	456	209.55	208.88
302.36		0.22	2.26	si	shl				purple	purple	IC1_209.8	457	209.8	209.13
302.53		0.22	0.17	si	slt						IC1_210.1	458	210.1	209.43	9.05e-05
302.88		0.22	0.35	ls	coq	biv					IC1_210.4	458	210.4	209.73	0.00018
304.58		0.22	1.7	si	shl				blue	blue	IC1_210.7	458	210.7	210.03
304.77		0.22	0.19	ash	ash				purple	purple	IC1_211	459	211	210.33
305.06		0.22	0.29	si	shl				olive	olive	IC1_211.3	461	211.3	210.67	0.000141
305.15		0.22	0.09	ls	mic						IC1_211.6	461	211.6	210.97	0.0001536
307.34		0.22	2.19	si	shl				purple	purple	IC1_212	463	212.02	211.39	8.08e-05
307.93		0.22	0.59	si	slt						IC1_212.3	464	212.3	211.67	0.0001425
307.95		0.22	0.02	si	slt						IC1_212.5	464	212.5	211.87
308.02		0.22	0.07	si	slt				purple	purple	IC1_212.8	465	212.8	212.17
308.15		0.22	0.13	ls	rib	fnlam					IC1_213.1	465	213.1	212.47	0.0001196
309.13		0.22	0.98	si	shl				purple	purple	IC1_213.4	466	213.4	212.77	0.0001149
309.43		0.22	0.3	si	shl				purple	purple	IC1_213.7	468	213.7	213.13	0.0001461
309.5		0.22	0.07	ls	rib						IC1_214	469	214	213.43	0.0001228
309.63		0.22	0.13	si	shl				purple	purple	IC1_214.15	469	214.15	213.58
309.67		0.22	0.04	ls	rib						IC1_214.3	470	214.3	213.73	0.0001311
310.06		0.22	0.39	si	shl				purple	purple	IC1_214.6	470	214.6	214.03	0.0001758
310.23		0.22	0.17	si	slt				grey	grey	IC1_214.9	470	214.9	214.33	0.000191
310.36		0.22	0.13	ls	mic						IC1_215.2	470	215.2	214.63	0.0002089
310.45		0.22	0.09	ls	grn						IC1_215.5	471	215.5	214.93
310.6		0.22	0.15	ls	rib						IC1_215.53	472	215.53	214.96
311.33		0.22	0.73	si	shl				olive	olive	IC1_215.83	473	215.83	215.26
311.44		0.22	0.11	ls	mic						IC1_216.1	474	216.1	215.59
311.63		0.22	0.19	si	shl				olive	olive	IC1_216.5	474	216.5	215.99
311.76		0.22	0.13	ls	rib						IC1_216.7	474	216.7	216.19
312.68		0.22	0.92	si	shl				purple	purple	IC1_216.75	474	216.75	216.24
312.93		0.22	0.25	ls	mic						IC1_216.8	474	216.8	216.29	0.0001206
313.11	0.02	0.24	0.18	ls	oo	wav					IC1_217	475	217	216.49	0.0001292
314.29		0.24	1.18	si	shl				purple	purple	IC1_217.3	475	217.3	216.79	0.0001867
315.47		0.24	1.18	si	slt				purple	purple	IC1_217.6	475	217.6	217.09	0.0001364
317.58		0.24	2.11	si	shl				purple	purple	IC1_217.9	475	217.9	217.39	0.0001937
319.15		0.24	1.57	si	slt	vug			purple	purple	IC1_218.2	476	218.2	217.69
320.3		0.24	1.15	si	shl				purple	purple	IC1_218.5	478	218.5	217.99
320.36		0.24	0.06	ls	rib						IC1_218.75	479	218.75	218.24
320.69		0.24	0.33	si	shl				purple	purple	IC1_219.1	481	219.1	218.59	0.0001542
320.79		0.24	0.1	si	slt				purple	purple	IC1_219.4	481	219.4	218.89	0.0001355
321.34		0.24	0.55	si	shl				purple	purple	IC1_219.7	483	219.7	219.19	0.0001655
322.03		0.24	0.69	si	slt	vug			purple	purple	IC1_220	486	220	219.49
324.16		0.24	2.13	si	shl				purple	purple	IC1_220.3	489	220.3	219.79	0.0001253
324.94		0.24	0.78	si	slt				purple	purple	IC1_220.6	489	220.6	220.09	0.0001731
325.71		0.24	0.77	si	shl				purple	purple	IC1_220.9	489	220.9	220.39	0.0001497
325.84		0.24	0.13	ls	rib						IC1_221.1	489	221.1	220.59	0.0001779
326.61		0.24	0.77	si	shl				purple	purple	IC1_221.33	490	221.33	220.82
326.81		0.24	0.2	si	slt			cc	purple	purple; cc	IC1_221.6	491	221.6	221.09
326.94		0.24	0.13	si	shl				purple	purple	IC1_222.2	493	222.2	221.69
327.28		0.24	0.34	si	slt	vug		cc	purple	purple; cc	IC1_222.37	494	222.37	221.86	0.0002422
327.36		0.24	0.08	si	slt				purple	purple	IC1_222.65	496	222.65	222.14
327.58		0.24	0.22	si	slt			cc	purple	purple; cc	IC1_222.76	496	222.76	222.25	0.0001391
327.67		0.24	0.09	si	slt				purple	purple	IC1_223.2	497	223.2	222.69
328.66		0.24	0.99	si	slt			cc	purple	purple; cc	IC1_223.56	498	223.56	223.05	0.0001371
329.69		0.24	1.03	si	shl				purple	purple	IC1_223.86	500	223.86	223.35	0.0001494
329.73		0.24	0.04	ls	rib						IC1_224.14	500	224.14	223.63
330.68		0.24	0.95	si	slt			cc	purple	purple; cc	IC1_224.3	502	224.3	223.79
332.37		0.24	1.69	si	shl				purple	purple	IC1_224.76	505	224.76	224.25	0.0001445
332.43		0.24	0.06	si	slt			cc	purple	purple; cc	IC1_225.06	506	225.06	224.55
333.6		0.24	1.17	si	shl				purple	purple	IC1_225.36	506	225.36	224.85	0.0001543
333.63		0.24	0.03	ls	rib						IC1_225.66	506	225.66	225.15	0.0001535
333.82		0.24	0.19	si	shl				green	green	IC1_225.96	508	225.96	225.45
333.94		0.24	0.12	ls	mic						IC1_226.26	510	226.26	225.75	0.0001593
334		0.24	0.06	ls	rib						IC1_226.5	511	226.5	225.99
334.05		0.24	0.05	ls	rib						IC1_226.87	512	226.87	226.36
334.07		0.24	0.02	si	shl						IC1_227.25	512	227.25	226.74
334.09		0.24	0.02	ls	rib						IC1_227.5	513	227.5	226.99
335.33		0.24	1.24	si	shl				purple	purple	IC1_227.86	514	227.86	227.35
335.38		0.24	0.05	ls	rib						IC1_228.16	514	228.16	227.65
336.15		0.24	0.77	si	shl				purple	purple	IC1_228.56	515	228.56	228.05
336.21		0.24	0.06	si	slt				purple	purple	IC1_229.12	518	229.12	228.61
336.54		0.24	0.33	si	shl			cc	purple	purple; cc	IC1_229.42	519	229.42	228.91
336.87		0.24	0.33	si	slt			cc	purple	purple; cc	IC1_229.82	519	229.82	229.31
337.35		0.24	0.48	si	slt	vug			purple	purple	IC1_230.12	519	230.12	229.61
339.13		0.24	1.78	si	shl				purple	purple	IC1_230.32	519	230.32	229.81
339.22		0.24	0.09	ls	mic						IC1_230.62	519	230.62	230.11
340.09		0.24	0.87	si	shl				purple	purple	IC1_230.92	519	230.92	230.41
341		0.24	0.91	si	slt	mas		cc		cc	IC1_231.22	519	231.22	230.71
342.37		0.24	1.37	si	shl				purple	purple	IC1_231.52	520	231.52	231.01
342.4		0.24	0.03	ls	rib	fnlam					IC1_231.82	521	231.82	231.31
342.6		0.24	0.2	si	slt				purple	purple	IC1_232.12	521	232.12	231.61
342.71		0.24	0.11	si	slt				purple	purple	IC1_232.8	521	232.8	232.29
342.94		0.24	0.23	si	slt				purple	purple	IC1_233.1	522	233.1	232.59
343.71		0.24	0.77	si	slt			cc	purple	purple; cc	IC1_233.32	523	233.32	232.82
344.06		0.24	0.35	si	slt				purple	purple	IC1_233.52	523	233.52	233.02
344.32		0.24	0.26	si	slt			cc	purple	purple; cc	IC1_233.52	524	233.52	233.02
345.53		0.24	1.21	si	shl				blue-green	blue-green	IC1_233.82	525	233.82	233.72
345.66		0.24	0.13	ls	rib						IC1_234.12	525	234.12	234.02
346.89	-0.1	0.14	1.23	si	shl				purple	purple	IC1_234.52	526	234.52	234.42
347.62		0.14	0.73	si	slt			cc	purple	purple; cc	IC1_234.72	527	234.72	234.62
347.77		0.14	0.15	si	slt				purple	purple	IC1_235.02	527	235.02	234.92
349.25		0.14	1.48	si	shl				purple	purple	IC1_235.32	527	235.32	235.22
350.48		0.14	1.23	si	slt				purple	purple	IC1_235.72	527	235.72	235.62
350.95		0.14	0.47	si	shl				purple	purple	IC1_236.02	527	236.02	235.92
351.39		0.14	0.44	si	slt				purple	purple	IC1_236.26	528	236.26	236.16
351.83		0.14	0.44	si	slt	vug			mustard	mustard	IC1_236.28	528	236.28	236.18
351.86		0.14	0.03	ls	rib						IC1_236.52	528	236.52	236.42
351.95		0.14	0.09	si	shl				olive	olive	IC1_236.82	529	236.82	236.72
352.29		0.14	0.34	si	slt	vug			purple	purple	IC1_237.12	529	237.12	237.02
353.34		0.14	1.05	si	shl						IC1_237.45	531	237.45	237.35
353.43		0.14	0.09	ls	rib						IC1_237.72	532	237.72	237.62
353.67		0.14	0.24	si	shl				olive	olive	IC1_238.02	532	238.02	237.92
353.7		0.14	0.03	ls	rib						IC1_238.32	532	238.32	238.22
353.9		0.14	0.2	si	shl				olive	olive	IC1_238.52	536	238.52	238.42
354.5		0.14	0.6	ls	rib						IC1_238.9	537	238.9	238.8
355.87		0.14	1.37	si	shl						IC1_239.22	538	239.22	239.12
356.09		0.14	0.22	ls	rc						IC1_239.52	538	239.52	239.42
356.28		0.14	0.19	si	shl				purple	purple	IC1_239.72	539	239.72	239.62
356.32		0.14	0.04	si	slt				purple	purple	IC1_239.95	541	239.95	239.85
356.41		0.14	0.09	ls	grn	bio					IC1_240.12	544	240.12	240.02
357.27		0.14	0.86	si	slt	vug			purple	purple	IC1_240.42	545	240.42	240.32
358.32		0.14	1.05	si	shl				blue-grey	blue-grey	IC1_240.72	546	240.72	240.62
358.76		0.14	0.44	ls	rib						IC1_241.04	546	241.04	240.94
358.91		0.14	0.15	si	shl				olive	olive	IC1_241.36	547	241.36	241.26
359.07		0.14	0.16	ls	rib				green	green	IC1_21.62	547	21.62	21.52
359.31		0.14	0.24	si	shl				olive	olive	IC1_241.9	547	241.9	241.8
359.71		0.14	0.4	ls	rib						IC1_242.2	547	242.2	242.1
360.61		0.14	0.9	si	shl				purple	purple	IC1_242.5	548	242.5	242.4
361.9		0.14	1.29	si	slt				purple	purple	IC1_242.82	549	242.82	242.72
362.31		0.14	0.41	si	shl				purple	purple	IC1_243.06	550	243.06	242.96
362.34		0.14	0.03	ls	rib						IC1_243.42	551	243.42	243.32
362.97		0.14	0.63	si	shl				purple	purple	IC1_243.57	552	243.57	243.37
363.05		0.14	0.08	ls	rib						IC1_243.72	553	243.72	243.52
363.14		0.14	0.09	si	shl				purple	purple	IC1_244.02	553	244.02	243.82
363.2		0.14	0.06	ls	rib						IC1_244.32	553	244.32	244.12
363.24		0.14	0.04	si	shl				purple	purple	IC1_244.62	553	244.62	244.42
363.26		0.14	0.02	ls	rib						IC1_244.92	553	244.92	244.72
363.37		0.14	0.11	si	shl				purple	purple	IC1_245.12	554	245.12	244.92
363.4		0.14	0.03	ls	rib						IC1_245.48	555	245.48	245.28
363.44		0.14	0.04	si	shl				green	green	IC1_245.82	556	245.82	245.62
363.48		0.14	0.04	ls	rib						IC1_246.08	556	246.08	245.88
363.54		0.14	0.06	si	shl						IC1_246.28	556	246.28	246.08
363.56		0.14	0.02	ls	rib						IC1_246.52	557	246.52	246.32
363.65		0.14	0.09	si	shl				green	green	IC1_246.72	557	246.72	246.52
363.67		0.14	0.02	ls	rib						IC1_247.1	559	247.1	246.9
363.71		0.14	0.04	si	shl						IC1_247.32	560	247.32	247.12
363.86		0.14	0.15	ls	grn	sup					IC1_247.62	560	247.62	247.42
364.42		0.14	0.56	si	shl				blue-grey	blue-grey	IC1_247.92	560	247.92	247.72
364.58		0.14	0.16	ls	rib						IC1_248.22	560	248.22	248.02
365.04		0.14	0.46	ls	grn	sup					IC1_248.52	560	248.52	248.32
365.42		0.14	0.38	COVER							IC1_248.82	560	248.82	248.62
365.66		0.14	0.24	si	slt				green	green	IC1_249.12	560	249.12	248.92
365.84		0.14	0.18	ls	rib						IC1_249.5	560	249.5	249.3
365.88		0.14	0.04	si	shl				olive	olive	IC1_249.75	560	249.75	249.55
365.96		0.14	0.08	ls	rib						IC1_250.02	560	250.02	249.82
366.02		0.14	0.06	si	shl				green	green	IC1_250.32	561	250.32	250.12
366.29		0.14	0.27	ls	rib						IC1_250.62	563	250.62	250.42
366.32		0.14	0.03	si	shl				olive	olive	IC1_250.92	563	250.92	250.72
366.4		0.14	0.08	ls	rib						IC1_251.2	563	251.2	251
366.47		0.14	0.07	si	shl				olive	olive	IC1_251.52	565	251.52	251.32
366.52		0.14	0.05	ls	rib						IC1_251.82	565	251.82	251.62
366.59		0.14	0.07	si	shl				olive	olive	IC1_252.12	565	252.12	251.92
366.63		0.14	0.04	ls	rib						IC1_252.42	566	252.42	252.22
366.82		0.14	0.19	si	shl				black	black	IC1_252.72	568	252.72	252.52
367		0.14	0.18	ls	rib						IC1_253.02	569	253.02	252.82
367.26		0.14	0.26	si	shl				black	black	IC1_253.3	572	253.3	253.1
367.31		0.14	0.05	ls	rib						IC1_253.6	573	253.6	253.4
368.4		0.14	1.09	si	shl				grey	grey	IC1_254.2	574	254.2	254
368.85		0.14	0.45	si	slt				purple	purple	IC1_254.55	578	254.55	254.35
369.95		0.14	1.1	si	shl				purple	purple	IC1_254.82	578	254.82	254.62
370.29		0.14	0.34	ls	grn	bio					IC1_255.05	580	255.05	254.85
370.75		0.14	0.46	si	shl				purple	purple	IC1_255.35	585	255.35	255.15
370.81		0.14	0.06	si	slt				purple	purple	IC1_255.65	591	255.65	255.45
370.84		0.14	0.03	ls	rib						IC1_255.92	591	255.92	255.72
370.96		0.14	0.12	ls	grn						IC1_256.02	591	256.02	255.82
371.07		0.14	0.11	ls	rib						IC1_256.25	592	256.25	256.05
371.25		0.14	0.18	si	slt				purple	purple	IC1_256.53	593	256.53	256.33
373.25		0.14	2	si	shl				purple	purple	IC1_256.62	593	256.62	256.42
374.26		0.14	1.01	si	slt				purple	purple	IC1_256.92	593	256.92	256.72
374.52		0.14	0.26	ls	rib						IC1_257.22	593	257.22	257.02
374.67		0.14	0.15	si	shl				purple	purple	IC1_257.55	594	257.55	257.35
374.71		0.14	0.04	ls	rib						IC1_257.77	596	257.77	257.57
374.82		0.14	0.11	si	shl				grey	grey	IC1_258.07	597	258.07	257.87
375.28		0.14	0.46	si	slt				purple	purple	IC1_258.41	597	258.41	258.21
376.83		0.14	1.55	si	shl				purple	purple	IC1_258.71	597	258.71	258.51
377.52		0.14	0.69	si	slt				purple	purple	IC1_259.02	597	259.02	258.82
379.06		0.14	1.54	si	shl				purple	purple	IC1_259.32	597	259.32	259.12
380.03		0.14	0.97	si	slt				purple	purple	IC1_259.62	597	259.62	259.42
380.65		0.14	0.62	si	shl				blue-green	blue-green	IC1_259.92	597	259.92	259.72
381.16		0.14	0.51	si	slt						IC1_260.22	597	260.22	260.02
381.28		0.14	0.12	ls	grn	mas					IC1_260.52	601	260.52	260.32
381.85		0.14	0.57	si	shl				olive	olive	IC1_260.82	601	260.82	260.62
381.97		0.14	0.12	ls	rib						IC1_261.12	601	261.12	260.92
381.99		0.14	0.02	si	shl				olive	olive	IC1_261.42	601	261.42	261.22
382.03		0.14	0.04	ls	rib						IC1_261.72	601	261.72	261.52
382.08		0.14	0.05	si	shl				olive	olive	IC1_261.99	603	261.99	261.79
382.12		0.14	0.04	ls	rib						IC1_262.02	604	262.02	261.82
382.2		0.14	0.08	si	shl				blue-green	blue-green	IC1_262.46	605	262.46	262.26
382.39		0.14	0.19	ls	rib						IC1_262.92	607	262.92	262.72
382.55		0.14	0.16	si	shl				blue-green	blue-green	IC1_263.22	607	263.22	263.02
382.6		0.14	0.05	ls	rib						IC1_263.52	607	263.52	263.32
382.64		0.14	0.04	si	shl				blue-green	blue-green	IC1_263.82	607	263.82	263.62
382.73		0.14	0.09	ls	rib						IC1_264.12	607	264.12	263.92
382.97		0.14	0.24	si	shl				blue-green	blue-green	IC1_264.42	607	264.42	264.22
383.11		0.14	0.14	ls	rib	bio					IC1_264.72	607	264.72	264.52
383.32		0.14	0.21	si	shl				purple	purple	IC1_265.02	607	265.02	264.82
384.28		0.14	0.96	si	slt				purple	purple	IC1_265.32	610	265.32	265.12
384.43		0.14	0.15	si	shl				blue-grey	blue-grey	IC1_265.62	611	265.62	265.42
384.62		0.14	0.19	ls	rib						IC1_265.92	611	265.92	265.72
384.85		0.14	0.23	si	shl				purple	purple	IC1_266.22	611	266.22	266.02
385.8		0.14	0.95	si	slt				purple	purple	IC1_266.52	611	266.52	266.32
385.98		0.14	0.18	ls	rib						IC1_266.82	611	266.82	266.62
386.6		0.14	0.62	COVER							IC1_267.12	611	267.12	266.92
387.64		0.14	1.04	si	slt				purple	purple	IC1_267.42	611	267.42	267.22
388.49		0.14	0.85	ls	rib						IC1_267.72	611	267.72	267.52
388.73		0.14	0.24	si	shl				blue-grey	blue-grey	IC1_268.02	611	268.02	267.82
388.99		0.14	0.26	si	slt						IC1_268.32	611	268.32	268.12
389.04		0.14	0.05	si	shl				blue-grey	blue-grey	IC1_268.62	612	268.62	268.42
389.32		0.14	0.28	ls	rib						IC1_268.92	613	268.92	268.72
389.37		0.14	0.05	si	shl						IC1_269.17	614	269.17	268.97
389.46		0.14	0.09	ls	rib						IC1_269.47	615	269.47	269.27
389.53		0.14	0.07	si	shl				blue-grey	blue-grey	IC1_269.77	617	269.77	269.57
389.81		0.14	0.28	ls	rib						IC1_270.07	617	270.07	269.87
390.26		0.14	0.45	si	shl				purple	purple	IC1_270.4	617	270.4	270.2
390.28		0.14	0.02	ls	rib						IC1_270.7	617	270.7	270.5
390.33		0.14	0.05	si	shl				purple	purple	IC1_271.02	617	271.02	270.82
390.38		0.14	0.05	ls	rib						IC1_271.32	617	271.32	271.12
390.41		0.14	0.03	si	shl						IC1_271.62	618	271.62	271.42
390.43		0.14	0.02	ls	rib						IC1_271.92	619	271.92	271.72
390.8		0.14	0.37	ls	rib	bio					IC1_272.22	620	272.22	272.02
391.76		0.14	0.96	si	slt				purple	purple	IC1_272.52	621	272.52	272.32
											IC1_272.82	622	272.82	272.62
											IC1_273.12	622	273.12	272.92
											IC1_273.45	623	273.45	273.25
											IC1_273.72	625	273.72	273.52
											IC1_274.02	625	274.02	273.82
											IC1_274.36	626	274.36	274.16
											IC1_274.62	627	274.62	274.42
											IC1_274.95	629	274.95	274.75
											IC1_275.26	630	275.26	275.06
											IC1_275.52	630	275.52	275.32
											IC1_275.82	630	275.82	275.62
											IC1_276.12	630	276.12	275.92
											IC1_276.42	630	276.42	276.22
											IC1_276.72	630	276.72	276.52
											IC1_277.02	631	277.02	276.82
											IC1_277.32	632	277.32	277.12
											IC1_277.62	632	277.62	277.42
											IC1_277.92	632	277.92	277.72
											IC1_278.22	632	278.22	278.02
											IC1_278.52	632	278.52	278.32
											IC1_278.9	633	278.9	278.7
											IC1_278.96	634	278.96	278.76
											IC1_279.12	637	279.12	278.92
											IC1_279.46	639	279.46	279.26
											IC1_279.72	639	279.72	279.52
											IC1_280.02	641	280.02	279.82
											IC1_280.35	642	280.35	280.15
											IC1_280.62	643	280.62	280.42
											IC1_280.92	643	280.92	280.72
											IC1_281.22	643	281.22	281.02
											IC1_281.52	643	281.52	281.32
											IC1_281.82	643	281.82	281.62
											IC1_282.12	644	282.12	281.92
											IC1_282.42	648	282.42	282.22
											IC1_282.74	649	282.74	282.54
											IC1_283.04	649	283.04	282.84
											IC1_284.34	649	284.34	284.14
											IC1_283.64	649	283.64	283.44
											IC1_283.94	649	283.94	283.74
											IC1_284.14	650	284.14	283.94
											IC1_284.2	650	284.2	284
											IC1_284.24	650	284.24	284.04
											IC1_284.54	651	284.54	284.34
											IC1_284.84	651	284.84	284.64
											IC1_285.14	651	285.14	284.94
											IC1_285.44	651	285.44	285.24
											IC1_285.74	651	285.74	285.54
											IC1_286.04	651	286.04	285.84
											IC1_286.34	651	286.34	286.14
											IC1_286.64	651	286.64	286.44
											IC1_286.92	652	286.92	286.72
											IC1_287.24	653	287.24	287.04
											IC1_287.54	653	287.54	287.34
											IC1_287.84	656	287.84	287.64
											IC1_288.44	656	288.44	288.24
											IC1_288.5	657	288.5	288.3
											IC1_288.74	658	288.74	288.54
											IC1_289.04	658	289.04	288.84
											IC1_289.34	658	289.34	289.14
											IC1_289.64	658	289.64	289.44
											IC1_289.94	658	289.94	289.74
											IC1_290.24	658	290.24	290.04
											IC1_290.54	658	290.54	290.34
											IC1_290.84	658	290.84	290.64
											IC1_291.14	658	291.14	290.94
											IC1_291.44	658	291.44	291.24
											IC1_291.74	658	291.74	291.54
											IC1_292.14	658	292.14	291.94
											IC1_292.39	659	292.39	292.19
											IC1_292.64	661	292.64	292.44
											IC1_292.94	661	292.94	292.74
											IC1_293.24	662	293.24	293.04
											IC1_293.54	662	293.54	293.34
											IC1_293.84	667	293.84	293.64
											IC1_294.14	668	294.14	293.94
											IC1_294.44	668	294.44	294.24
											IC1_294.74	668	294.74	294.54
											IC1_295.04	668	295.04	294.84
											IC1_295.34	668	295.34	295.14
											IC1_295.98	671	295.98	295.8
											IC1_296.24	672	296.24	296.06
											IC1_296.54	672	296.54	296.36
											IC1_296.84	672	296.84	296.66
											IC1_297.14	672	297.14	296.96
											IC1_297.24	673	297.24	297.06
											IC1_297.42	675	297.42	297.24
											IC1_297.74	676	297.74	297.96
											IC1_298.04	676	298.04	298.26
											IC1_298.34	676	298.34	298.56
											IC1_298.64	676	298.64	298.86
											IC1_298.94	676	298.94	299.16
											IC1_299.26	677	299.66	299.88
											IC1_299.56	679	299.96	300.18
											IC1_299.71	683	300.11	300.33
											IC1_300.04	684	300.44	300.66
											IC1_300.44	684	300.84	301.06
											IC1_300.74	684	301.14	301.36
											IC1_301.04	684	301.44	301.66
											IC1_301.34	684	301.74	301.96
											IC1_301.64	684	302.04	302.26
											IC1_301.94	684	302.34	302.56
											IC1_302.44	686	302.84	303.06
											IC1_302.74	687	303.14	303.36
											IC1_303.04	687	303.44	303.66
											IC1_303.44	687	303.84	304.06
											IC1_303.74	687	304.14	304.36
											IC1_304.04	687	304.44	304.66
											IC1_304.4	688	304.8	305.02
											IC1_304.64	689	305.04	305.26
											IC1_304.85	690	305.25	305.47
											IC1_304.94	691	305.34	305.56
											IC1_305.24	691	305.64	305.86
											IC1_305.54	691	305.94	306.16
											IC1_305.84	691	306.24	306.46
											IC1_306.14	691	306.54	306.76
											IC1_306.44	691	306.84	307.06
											IC1_306.74	691	307.14	307.36
											IC1_307.09	691	307.49	307.71
											IC1_307.43	692	307.83	308.05
											IC1_307.94	695	308.34	308.56
											IC1_308.24	696	308.64	308.86
											IC1_308.54	696	308.94	309.16
											IC1_308.9	696	309.3	309.52
											IC1_309.14	697	309.54	309.76
											IC1_309.44	700	309.84	310.06
											IC1_309.74	701	310.14	310.36
											IC1_310.04	703	310.44	310.66
											IC1_310.2	704	310.6	310.82
											IC1_310.34	706	310.74	310.96
											IC1_310.64	706	311.04	311.26
											IC1_310.94	706	311.34	311.56
											IC1_311.24	708	311.64	311.86
											IC1_311.41	709	311.81	312.03
											IC1_311.54	709	311.94	312.16
											IC1_311.84	710	312.24	312.46
											IC1_312.44	710	312.84	313.06
											IC1_312.76	712	313.16	313.4
											IC1_312.99	713	313.39	313.63
											IC1_313.34	713	313.74	313.98
											IC1_313.64	713	314.04	314.28
											IC1_313.94	713	314.34	314.58
											IC1_314.24	714	314.64	314.88
											IC1_314.54	714	314.94	315.18
											IC1_314.84	714	315.24	315.48
											IC1_315.14	714	315.54	315.78
											IC1_315.44	715	315.84	316.08
											IC1_315.74	715	316.14	316.38
											IC1_316.04	715	316.44	316.68
											IC1_316.34	715	316.74	316.98
											IC1_316.64	715	317.04	317.28
											IC1_316.94	715	317.34	317.58
											IC1_317.54	716	317.94	318.18
											IC1_317.84	716	318.24	318.48
											IC1_318.14	716	318.54	318.78
											IC1_318.74	716	319.14	319.38
											IC1_319.04	717	319.44	319.68
											IC1_319.34	717	319.74	319.98
											IC1_319.64	717	320.04	320.28
											IC1_319.94	717	320.34	320.58
											IC1_320.14	719	320.54	320.78
											IC1_320.54	720	320.94	321.18
											IC1_320.84	721	321.24	321.48
											IC1_321.14	722	321.54	321.78
											IC1_321.54	722	321.94	322.18
											IC1_321.72	722	322.12	322.36
											IC1_322.04	723	322.44	322.68
											IC1_322.34	723	322.74	322.98
											IC1_322.64	723	323.04	323.28
											IC1_322.94	723	323.34	323.58
											IC1_323.24	723	323.64	323.88
											IC1_323.54	723	323.94	324.18
											IC1_323.84	723	324.24	324.48
											IC1_324.22	724	324.62	324.86
											IC1_324.54	724	324.94	325.18
											IC1_324.74	725	325.14	325.38
											IC1_325.04	725	325.44	325.68
											IC1_325.34	725	325.74	325.98
											IC1_325.64	727	326.04	326.28
											IC1_325.94	727	326.34	326.58
											IC1_326.24	727	326.64	326.88
											IC1_326.54	728	326.94	327.18
											IC1_326.84	730	327.24	327.48
											IC1_327.14	732	327.54	327.78
											IC1_327.44	734	327.84	328.08
											IC1_327.74	734	328.14	328.38
											IC1_328.04	734	328.44	328.68
											IC1_328.34	734	328.74	328.98
											IC1_328.64	735	329.04	329.28
											IC1_328.94	735	329.34	329.58
											IC1_329.24	735	329.64	329.88
											IC1_329.54	737	329.94	330.18
											IC1_329.84	737	330.24	330.48
											IC1_330.14	737	330.54	330.78
											IC1_330.44	737	330.84	331.08
											IC1_330.74	738	331.14	331.38
											IC1_331.04	738	331.44	331.68
											IC1_331.34	738	331.74	331.98
											IC1_331.64	738	332.04	332.28
											IC1_331.94	738	332.34	332.58
											IC1_332.14	739	332.54	332.78
											IC1_332.24	740	332.64	332.88
											IC1_332.54	740	332.94	333.18
											IC1_332.84	740	333.24	333.48
											IC1_333.14	740	333.54	333.78
											IC1_333.34	740	333.74	333.98
											IC1_333.76	744	334.16	334.4
											IC1_334.04	748	334.44	334.68
											IC1_334.64	748	335.04	335.28
											IC1_334.94	748	335.34	335.58
											IC1_335.54	750	335.94	336.18
											IC1_335.84	750	336.24	336.48
											IC1_336.14	752	336.54	336.78
											IC1_336.44	753	336.84	337.08
											IC1_336.74	755	337.14	337.38
											IC1_337.04	755	337.44	337.68
											IC1_337.34	755	337.74	337.98
											IC1_337.64	755	338.04	338.28
											IC1_337.94	755	338.34	338.58
											IC1_338.24	755	338.64	338.88
											IC1_338.54	755	338.94	339.18
											IC1_338.84	755	339.24	339.48
											IC1_339.14	757	339.54	339.78
											IC1_339.44	757	339.84	340.08
											IC1_339.74	757	340.14	340.38
											IC1_340.1	758	340.5	340.74
											IC1_340.34	758	340.74	340.98
											IC1_340.64	758	341.04	341.28
											IC1_340.94	759	341.34	341.58
											IC1_341.24	759	341.64	341.88
											IC1_341.54	759	341.94	342.18
											IC1_341.84	759	342.24	342.48
											IC1_342.14	760	342.54	342.78
											IC1_342.44	762	342.84	343.08
											IC1_342.74	764	343.14	343.38
											IC1_343.04	764	343.44	343.68
											IC1_343.34	764	343.74	343.98
											IC1_343.64	765	344.04	344.28
											IC1_343.94	766	344.34	344.58
											IC1_344.24	767	344.64	344.88
											IC1_344.54	767	344.94	345.18
											IC1_344.84	767	345.24	345.48
											IC1_345.14	767	345.54	345.78
											IC1_345.42	768	345.82	346.06
											IC1_345.74	769	346.14	346.28
											IC1_346.04	769	346.44	346.58
											IC1_346.34	769	346.74	346.88
											IC1_346.64	769	347.04	347.18
											IC1_346.94	770	347.34	347.48
											IC1_347.24	770	347.64	347.78
											IC1_347.54	771	347.94	348.08
											IC1_347.84	772	348.24	348.38
											IC1_348.44	772	348.84	348.98
											IC1_348.74	772	349.14	349.28
											IC1_349.04	772	349.44	349.58
											IC1_349.34	773	349.74	349.88
											IC1_349.68	773	350.08	350.22
											IC1_349.9	773	349.9	350.04
											IC1_350.26	773	350.26	350.4
											IC1_351.26_TR2	776	351.26	351.4
											IC1_351.54_TR2	776	351.54	351.68
											IC1_351.84_TR2	779	351.84	351.98
											IC1_352.14_TR2	779	352.14	352.28
											IC1_352.44_TR2	780	352.44	352.58
											IC1_352.74_TR2	780	352.74	352.88
											IC1_353.04_TR2	780	353.04	353.18
											IC1_353.34_TR2	782	353.34	353.48
											IC1_353.64_TR2	784	353.64	353.78
											IC1_353.92_TR2	785	353.92	354.06
											IC1_354.21_TR2	785	354.21	354.35
											IC1_354.54_TR2	786	354.54	354.68
											IC1_354.84_TR2	786	354.84	354.98
											IC1_355.44_TR2	786	355.44	355.58
											IC1_355.8_TR2	787	355.8	355.94
											IC1_357.24_TR2	792	357.24	357.38
											IC1_357.54_TR2	792	357.54	357.68
											IC1_357.84_TR2	792	357.84	357.98
											IC1_358.14_TR2	792	358.14	358.28
											IC1_358.54_TR2	793	358.54	358.68
											IC1_359.04_TR2	796	359.04	359.18
											IC1_359.34_TR2	797	359.34	359.48
											IC1_359.64_TR2	798	359.64	359.78
											IC1_360.24_TR2	798	360.24	360.38
											IC1_360.8_TR2	799	360.8	360.94
											IC1_361.13_TR2	799	361.13	361.27
											IC1_361.58_TR2	799	361.58	361.72
											IC1_361.75_TR2	799	361.75	361.89
											IC1_350.64	800	362.06	362.2
											IC1_350.77	801	362.19	362.33
											IC1_350.94	802	362.36	362.5
											IC1_351.24	802	362.66	362.8
											IC1_351.45	803	362.87	363.01
											IC1_351.7	807	363.12	363.26
											IC1_351.85	810	363.27	363.41
											IC1_352.29	817	363.71	363.85
											IC1_352.44	818	363.86	364
											IC1_352.74	818	364.16	364.3
											IC1_352.96	819	364.38	364.52
											IC1_353.24	820	364.66	364.8
											IC1_353.43	820	364.85	364.99
											IC1_353.94	822	365.36	365.5
											IC1_354.24	823	365.66	365.8
											IC1_354.85	830	366.27	366.41
											IC1_355.14	834	366.56	366.7
											IC1_355.43	835	366.85	366.99
											IC1_355.74	837	367.16	367.3
											IC1_356.04	838	367.46	367.6
											IC1_356.34	838	367.76	367.9
											IC1_356.64	838	368.06	368.2
											IC1_356.94	839	368.36	368.5
											IC1_357.59	840	369.01	369.15
											IC1_357.89	840	369.31	369.45
											IC1_358.19	840	369.61	369.75
											IC1_358.7	841	370.12	370.26
											IC1_358.88	842	370.3	370.44
											IC1_359.09	842	370.51	370.65
											IC1_359.39	845	370.81	370.95
											IC1_359.69	847	371.11	371.25
											IC1_359.99	848	371.41	371.55
											IC1_360.29	848	371.71	371.85
											IC1_360.59	848	372.01	372.15
											IC1_360.89	848	372.31	372.45
											IC1_361.19	848	372.61	372.75
											IC1_361.49	848	372.91	373.05
											IC1_361.79	849	373.21	373.35
											IC1_362.13	849	373.55	373.69
											IC1_362.39	849	373.81	373.95
											IC1_362.69	849	374.11	374.25
											IC1_362.75	850	374.17	374.31
											IC1_362.99	851	374.41	374.55
											IC1_363.13	852	374.55	374.69
											IC1_363.29	853	374.71	374.85
											IC1_364.02	854	375.44	375.58
											IC1_364.32	855	375.74	375.88
											IC1_364.62	855	376.04	376.18
											IC1_364.92	855	376.34	376.48
											IC1_365.22	855	376.64	376.78
											IC1_365.52	856	376.94	377.08
											IC1_365.82	856	377.24	377.38
											IC1_366.12	857	377.54	377.68
											IC1_366.42	857	377.84	377.98
											IC1_366.72	857	378.14	378.28
											IC1_367.02	857	378.44	378.58
											IC1_367.32	857	378.74	378.88
											IC1_367.62	858	379.04	379.18
											IC1_367.92	858	379.34	379.48
											IC1_368.22	858	379.64	379.78
											IC1_368.52	859	379.94	380.08
											IC1_369.12	860	380.54	380.68
											IC1_369.42	860	380.84	380.98
											IC1_369.72	861	381.14	381.28
											IC1_370.02	862	381.44	381.58
											IC1_370.32	863	381.74	381.88
											IC1_370.62	868	382.04	382.18
											IC1_370.92	870	382.34	382.48
											IC1_371.22	874	382.64	382.78
											IC1_371.5	875	382.92	383.06
											IC1_371.82	877	383.24	383.38
											IC1_372.12	877	383.54	383.68
											IC1_372.42	877	383.84	383.98
											IC1_372.72	877	384.14	384.28
											IC1_373.02	879	384.44	384.58
											IC1_373.28	880	384.7	384.84
											IC1_373.62	881	385.04	385.18
											IC1_373.92	881	385.34	385.48
											IC1_374.22	881	385.64	385.78
											IC1_374.33	882	385.75	385.89
											IC1_375.12	884	386.54	386.68
											IC1_375.42	884	386.84	386.98
											IC1_375.72	884	387.14	387.28
											IC1_376.02	884	387.44	387.58
											IC1_376.36	885	387.78	387.92
											IC1_376.62	885	388.04	388.18
											IC1_376.92	885	388.34	388.48
											IC1_377.22	887	388.64	388.78
											IC1_377.52	889	388.94	389.08
											IC1_377.82	891	389.24	389.38
											IC1_378.72	895	390.14	390.28
											IC1_379.02	900	390.44	390.58
											IC1_379.32	901	390.74	390.88
											IC1_379.62	901	391.04	391.18
